1 **Novel CSF tau biomarkers can be used for disease staging of**  
2 **sporadic Alzheimer's disease**

3

4 Gemma Salvadó<sup>1,#</sup>, Kanta Horie<sup>2,3,4</sup>, Nicolas R. Barthélemy<sup>2,3</sup>, Jacob W. Vogel<sup>1,5</sup>, Alexa  
5 Pichet Binette<sup>1</sup>, Charles D. Chen<sup>6</sup>, Andrew J Aschenbrenner<sup>3,7</sup>, Brian A. Gordon<sup>6</sup>, Tammie  
6 L.S. Benzinger<sup>6,7</sup>, David M. Holtzman<sup>3,7</sup>, John C. Morris<sup>3,7</sup>, Sebastian Palmqvist<sup>1</sup>, Erik  
7 Stomrud<sup>1,8</sup>, Shorena Janelidze<sup>1</sup>, Rik Ossenkoppele<sup>1,9,10</sup>, Suzanne E. Schindler<sup>3,7</sup>, Randall  
8 J. Bateman<sup>2,3,7</sup>, Oskar Hansson<sup>1,8,#</sup>

9

10 <sup>1</sup> Clinical Memory Research Unit, Department of Clinical Sciences Malmö, Lund University,  
11 Lund, Sweden

12 <sup>2</sup> The Tracy Family SILQ Center, Washington University School of Medicine, St Louis, MO,  
13 United States

14 <sup>3</sup> Department of Neurology, Washington University School of Medicine, St. Louis, MO,  
15 United States

16 <sup>4</sup> Eisai Inc., Nutley, NJ, United States

17 <sup>5</sup> Department of Clinical Science, Malmö, SciLifeLab, Lund University, Lund, Sweden

18 <sup>6</sup> Department of Radiology, Washington University School of Medicine, St. Louis, MO, USA

19 <sup>7</sup> Charles F. and Joanne Knight Alzheimer Disease Research Center, Washington  
20 University School of Medicine, St. Louis, MO, USA

21 <sup>8</sup> Memory Clinic, Skåne University Hospital, Malmö, Sweden

22 <sup>9</sup> Alzheimer Center Amsterdam, Neurology, Vrije Universiteit Amsterdam, Amsterdam UMC  
23 location VUmc, Amsterdam, The Netherlands

24 <sup>10</sup> Amsterdam Neuroscience, Neurodegeneration, Amsterdam, The Netherlands

25

26 **# Corresponding authors:**

27 Oskar Hansson, MD, PhD

28 Memory Clinic, Skåne University Hospital

29 SE-205 02, Malmö, Sweden

30 E-mail: oskar.hansson@med.lu.se; Tel: +46 (0)40 331000

31

32 Or

33

34 Gemma Salvadó, PhD

35 Clinical Memory Research Unit, Department of Clinical Sciences

36 SE-205 02, Malmö, Sweden

37 E-mail: gemma.salvado@med.lu.se; Tel: +46 (0)40 331000

38

39 **Abstract**

40 Biological staging of individuals with Alzheimer's disease (AD) may improve diagnostic  
41 and prognostic work-up of dementia in clinical practice and the design of clinical trials.  
42 Here, we created a staging model using the Subtype and Stage Inference (SuStaln)  
43 algorithm by evaluating cerebrospinal fluid (CSF) amyloid- $\beta$  ( $A\beta$ ) and tau biomarkers in  
44 426 participants from BioFINDER-2, that represent the entire spectrum of AD. The  
45 model composition and main analyses were replicated in 222 participants from the  
46 Knight ADRC cohort. SuStaln revealed in the two cohorts that the data was best  
47 explained by a single biomarker sequence (one subtype), and that five CSF biomarkers  
48 (ordered:  $A\beta_{42/40}$ , tau phosphorylation occupancies at the residues 217 and 205  
49 [pT217/T217 and pT205/T205], microtubule-binding region of tau containing the  
50 residue 243 [MTBR-tau243], and total tau) were sufficient to create an accurate  
51 disease staging model. Increasing CSF stages (0-5) were associated with increased  
52 abnormality in other AD-related biomarkers, such as  $A\beta$ - and tau-PET, and aligned with  
53 different phases of longitudinal biomarker changes consistent with current models of  
54 AD progression. Higher CSF stages at baseline were associated with higher hazard  
55 ratio of clinical decline. Our findings indicate that a common pathophysiologic  
56 molecular pathway develops across all AD patients, and that a single CSF collection is  
57 sufficient to reliably indicate the presence of both AD pathologies and the degree and  
58 stage of disease progression.

## 59 Introduction

60 Currently, more than 50 million people are affected by dementia and this number is  
61 expected to more than double by 2050<sup>1</sup>. Alzheimer's disease (AD) is the most common  
62 form of dementia, characterized by the accumulation of extracellular plaques containing  
63 amyloid- $\beta$  (A $\beta$ ) and intracellular tau aggregates in the forms of tau tangles and neuropil  
64 threads<sup>2</sup>. Over the last two decades, the AD field has moved towards the use of  
65 biomarkers to support the diagnostic and prognostic work-up, rather than relying solely  
66 on clinical symptoms<sup>3</sup>. This has been made possible by advancements of imaging and  
67 fluid biomarkers that accurately track AD pathology *in vivo*. Given that the accumulation  
68 of pathology can take many years to decades<sup>3</sup>, before any clinical symptoms appear,  
69 the use of biomarkers is critical to ensuring an early and reliable detection of AD<sup>4</sup>. Key  
70 biomarkers may help to improve patient diagnosis, management and prognosis<sup>5-8</sup>. And  
71 the use of AD biomarkers will be even more important when disease-modifying  
72 treatments become widely available<sup>9-11</sup>. In this context, a more sophisticated  
73 personalized medicine approach of AD, based on high performing AD biomarkers, will  
74 become crucial to select the most optimal participants for specific treatments and for  
75 enrolment in new clinical trials.

76 In recent years, multiple cerebrospinal fluid (CSF) biomarkers targeting different  
77 pathophysiological mechanisms have been developed (see<sup>4</sup> for a review). There has  
78 been an increasing interest in developing biomarkers for measuring tau species  
79 phosphorylated at different residues. Among the phosphorylated tau (p-tau) species, p-  
80 tau181<sup>12-17</sup>, p-tau217<sup>12,13,15,18,19</sup>, and p-tau231<sup>15,20-22</sup> or the phosphorylation  
81 occupancies have been studied in depth, and have shown strong associations with A $\beta$   
82 pathology and moderate associations with tau (as measured by both PET<sup>18,23</sup> and  
83 neuropathology<sup>24,25</sup>). These biomarkers have shown their utility on improving the  
84 diagnostic work-up of AD and the prediction of disease progression<sup>12,13,19,26,27</sup>. Other  
85 biomarkers, such as p-tau205 or the occupancy (pT205/T205)<sup>28-30</sup> and microtubule  
86 binding region (MTBR) of tau containing the 243 residue (MTBR-tau243)<sup>31,32</sup>, have  
87 been more closely related to tau tangle pathology. Importantly, some of these CSF  
88 biomarkers were shown to become abnormal at different phases during the  
89 progression of autosomal dominant AD (ADAD)<sup>29</sup>, suggesting a sequence of CSF  
90 biomarker changes that may serve as a measurable biological indicator tracking  
91 advancing disease progression.

92 The progression of A $\beta$ - or tau- pathology across the brain has been previously used to  
93 stage participants across the AD *continuum*<sup>33-38</sup>. However, these models need at least  
94 one A $\beta$ - or tau-PET scan, which is expensive, and requires specialized personnel and

95 facilities. Further, information of only one pathological measure (e.g., A $\beta$  or tau) can be  
96 obtained from these images. On the other hand, CSF biomarkers are less expensive,  
97 more accessible, and multiple pathological measures may be obtained from a single  
98 sample. Given this, and with the idea that different CSF biomarkers may become  
99 abnormal at different stages of the disease, we aimed to generate a data-driven  
100 staging scheme for sporadic AD using key CSF tau biomarkers in combination with  
101 CSF A $\beta$ 42/40. An unresolved question is whether there is a single molecular pathway  
102 throughout the AD *continuum*, or whether there are subtypes of AD following different  
103 fluid biomarker trajectories, as has been shown for regional spread of insoluble tau  
104 tangles<sup>36,39,40</sup>.

105 To test this, we used Subtype and Stage Inference (SuStaln)<sup>41</sup> to model the most likely  
106 sequence of CSF biomarker abnormalities that occur along the AD time course. This  
107 machine-learning method uses cross-sectional data to order biomarker abnormalities in  
108 a probabilistic manner and at the same time addresses possible diverging trajectories  
109 of this ordering. With this approach, we staged 426 participants of the Swedish  
110 BioFINDER-2 study, ranging from cognitively unimpaired (CU) participants to patients  
111 with mild cognitive impairment (MCI) or dementia. This model was used to assign each  
112 participant to a fluid biomarker stage, which was subsequently correlated with  
113 established AD key features such as A $\beta$ - and tau-PET, cortical thickness, and  
114 cognition. Next, we investigated the accuracy of our staging model to predict amyloid  
115 (A) and tau (T) status as defined by PET<sup>42</sup>, as well as its potential as a diagnostic tool  
116 for distinguishing diagnostic groups. Using longitudinal data, we further determined  
117 trajectories of several key AD-biomarkers based on participants baseline fluid  
118 biomarker disease stage. We also tested the clinical utility of our novel staging system  
119 for predicting clinical progression. Finally, we performed the main analyses in the  
120 independent cohort (the Charles F. and Joanne Knight Alzheimer Disease Research  
121 Center [Knight-ADRC]), which included 222 participants. Altogether our results suggest  
122 that participants in the AD *continuum* progress along a single path and can be  
123 biologically staged using a single sample of CSF. This may have important implications  
124 in the clinical practice and in the selection of participants for future clinical trials.

125

## 126 **Results**

127 A total of 426 participants of the Swedish BioFINDER-2 study (NCT03174938)<sup>19</sup> with  
128 complete CSF data were included in this study. From these, 80 were cognitively  
129 unimpaired A $\beta$  negative (CU-) and 79 cognitively unimpaired A $\beta$  positive (CU+)  
130 participants, 88 were diagnosed with MCI and A $\beta$  positive, 100 were diagnosed with

131 AD dementia and A $\beta$  positive (ADD+), and 79 were assessed as non-AD patients (22  
132 were A $\beta$  positive). Demographic information is presented in Table 1. Of these, 220  
133 participants had longitudinal CSF data available (Supplementary Table 1).

134

### 135 **CSF staging model**

136 We initially applied SuStaln to the BioFINDER-2 cohort using the following CSF  
137 biomarkers: the A $\beta$ 42/40 ratio, the phosphorylated to non-phosphorylated tau ratio of  
138 pT205/T205, pT181/T181, pT217/T217, and pT231/T231, as well as the concentrations  
139 of MTBR-tau243 and total tau [the residue 151-153] based on availability and previous  
140 literature. Through a process of model optimization (Ext. Data Fig. 1, see Methods for  
141 further details), we arrived on a model that excluded pT181/T181 and pT231/T231 due  
142 to information redundancy. SuStaln revealed that a single biomarker sequence best  
143 described the progressive abnormality of the selected biomarkers (Ext Data Fig. 1C).  
144 The final ordering of the model was the A $\beta$ 42/40 ratio, pT217/T217, pT205/T205,  
145 MTBR-tau243 and total-tau (Fig. 1A), resulting in a five-stage model (plus stage 0 as a  
146 negative biomarker stage). All BioFINDER-2 participants were then classified into one  
147 of these biomarker-based disease stages based on their CSF levels, with 124 (29.1%)  
148 being at CSF stage 0, 35 (8.2%) at CSF stage 1, 53 (12.4%) at CSF stage 2, 49  
149 (11.5%) at CSF stage 3, 87 (20.4%) at CSF stage 4 and 78 (18.3%) at CSF stage 5.  
150 Demographic, genetic, and diagnostic characteristics of these participants is shown in  
151 Ext Data Fig. 2. In brief, the CSF biomarker-based was not associated with sex  
152 ( $\chi^2(5)=7.7$ ,  $p=0.180$ ) or years of education ( $\chi^2(5)=4.7$ ,  $p=0.452$ ), but higher CSF stage  
153 was associated with older age ( $\chi^2(5)=16.9$ ,  $p=0.005$ ), carriership of an *APOE- $\epsilon$ 4* allele  
154 ( $\chi^2(5)=72.8$ ,  $p<0.001$ ) and a more advanced clinical disease stage ( $\chi^2(5)=478.6$ ,  
155  $p<0.001$ , Ext Data Fig. 2A-E).

156 We then examined the distribution of the CSF biomarkers included in the model by  
157 CSF biomarker stage. Individual plots by CSF biomarker can be found in Fig. 1B and  
158 statistics for each biomarker and their differences by CSF stage can be found in  
159 Supplementary Table 2. In summary, degree of abnormality of all biomarkers increased  
160 with higher CSF stages, although their trajectories were different. CSF A $\beta$ 42/40 and  
161 pT205/T205 had a steep increase at stage 1 and stage 3, respectively, and then  
162 continued increasing but in a lower degree. On the other hand, pT217/T217 (CSF  
163 stage 2) and MTBR-tau243 (CSF stage 4) levels continued to increase at all  
164 subsequent CSF stages in a similar degree after crossing the threshold for positivity.  
165 Also, both pT217/T217 and MTBR-tau243 reached very high levels compared to the  
166 reference control group (z-score>10). These different biomarker trajectories revealed

167 that the included CSF biomarkers exhibit different behaviours across the disease  
168 *continuum*, aside from the biomarker disease stage at which they become abnormal.  
169 This is summarized in figure 1C, in which the smoothed locally estimated scatterplot  
170 smoothing (LOESS) regression of all CSF biomarkers are plotted.

171 Finally, we assessed the stability of our model using the longitudinal CSF data over a  
172 mean (SD) of 2.1 (0.2) years (n=220, Supplementary Table 1). We observed that most  
173 participants remained at the same stage (N=183, 83.2%) or progressed (n=29, 13.2%),  
174 while only few regressed (n=8, 2.9%, Ext Fig. 3A-B). Of those that progressed, most  
175 (n=25, 86.2%) progressed only one CSF stage during the two-year follow-up. This  
176 indicates a high stability of our model over time.

177

### 178 **CSF biomarker stages are associated with AD pathology, biomarkers and** 179 **cognition**

180 Next, we investigated the association between CSF stages and insoluble A $\beta$   
181 aggregates (A $\beta$ -PET), insoluble tau aggregates (tau-PET), neurodegeneration (cortical  
182 thickness and CSF neurofilament light [NfL]) and cognition, using a global cognitive  
183 composite sensitive to early AD changes (modified version of preclinical Alzheimer's  
184 Cognitive Composite [mPACC]<sup>35</sup>, Fig. 2). The degree of biomarker abnormality  
185 increased with higher CSF stages, although the trajectories were different. For  
186 instance, A $\beta$ -PET was the first to start increasing (already at CSF stage 1 [A $\beta$ 42/40  
187 stage],  $\Delta z$ -score=1.12, p=0.032 compared to the previous stage) and continued to  
188 increase until the CSF stage 5 (total-tau stage), where it reached a plateau. However, it  
189 was at CSF stage 2 (pT217/T217) that the mean of A $\beta$ -PET was above 1.96SD  
190 (95%CI) of CU- levels (mean[SD] z-score=4.01[2.71]). Tau-PET was the next  
191 biomarker to show a significant increase, emerging at CSF stage 3 (pT205/T205 stage,  
192  $\Delta z$ -score=2.09, p<0.001), in which its mean was already above 1.96SD of CU-  
193 (mean[SD] z-score=2.02[3.16]). Notably, tau-PET levels continued to significantly  
194 increase in all subsequent CSF stages. The mPACC followed a similar trajectory,  
195 starting to increase also at CSF stage 3 (pT205/T205 stage,  $\Delta z$ -score=0.92, p=0.004),  
196 and crossing the 1.96SD threshold at the following stage (mean[SD] z-  
197 score=2.60[1.84]). Finally, both measures of neurodegeneration (cortical thickness and  
198 CSF NfL) showed a significantly lower degree of abnormality compared to the other  
199 biomarkers, even in the most advanced CSF stages. The abnormality of cortical  
200 thickness significantly increased at CSF stage 3 (pT205/T205 stage,  $\Delta z$ -score=0.80,  
201 p=0.006), but it was above the 1.96SD (95%CI) threshold only at the last CSF stage  
202 (total-tau stage, mean[SD] z-score=2.07[1.91]). CSF NfL, on the other hand, only

203 showed significant differences between CSF stages 3 and 4 ( $\Delta z$ -score=0.36,  $p=0.016$ ),  
204 but did not cross the 1.96SD threshold at any CSF stage. Statistics of each these AD  
205 biomarkers and their differences per CSF stage can be found in Supplementary Table  
206 3.

207 We further studied the associations between our CSF-based staging model and other  
208 biomarkers as additional analyses. For tau-PET, we quantified the signal in different  
209 brain regions, using the previously validated ROIs reflecting the different Braak  
210 stages<sup>43</sup>. Early (Braak I) and intermediate (Braak III-IV) regions of tau deposition  
211 become abnormal at CSF stage 3 (pT205/T205 stage, Braak I: mean z-score: 2.26;  
212 Braak III-IV: mean z-score: 1.97) and later regions (Braak V-VI) become abnormal at  
213 the CSF stage 4 (MTBR-tau243 stage, mean z-score: 4.58; Ext Data. Fig. 4 and  
214 Supplementary Table 4). Noteworthy, the number of participants with Braak I z-scores  
215 over 1.96SD at CSF stage 3 was higher than that with Braak III-IV ( $n=21$ , 42.9% vs.  
216  $n=14$ , 28.6%).

217 We also examined different measures of cognitive function including composites for  
218 memory, executive, language and visuospatial functions, respectively. The first  
219 composite to cross the 1.96SD threshold was memory at CSF stage 4 (mean z-score:  
220 2.18), and kept increasing in the next CSF stage (Ext. Data Fig. 5 and Supplementary  
221 Table 5). This was followed by the executive function composite, which was above the  
222 threshold at CSF stage 5 (t-tau stage, mean z-score: 2.15). Finally, the language and  
223 visuospatial cognitive composites showed an increasing degree of abnormality across  
224 CSF stages but did not cross the 1.96SD threshold at any CSF stage.

225

### 226 **CSF biomarker stages can be used for predicting A/T status and cognitive stages**

227 Subsequently, we looked at the accuracy of our CSF staging model for predicting A $\beta$   
228 (A) and tau (T) status, as defined by PET<sup>34</sup>. We first looked at each independent  
229 pathology dichotomously (*i.e.*, positive or negative) and independently and, later, we  
230 looked at the ordinal categories merging both pathologies (*i.e.*, A-T-, A+T-, and A+T+).  
231 The number of positive participants by CSF stage and category are presented in Fig.  
232 3A. Using receiver operating characteristic (ROC) curves analyses, we determined that  
233 CSF stage 2 (pT217/T217 stage) was the optimal threshold for predicting A $\beta$ -PET  
234 positivity with high accuracy (area under the curve and 95% confidence interval  
235 [AUC[95%CI]]=0.96[0.93, 0.98], sensitivity=0.93 and specificity=0.89, first column Fig.  
236 3B and Supplementary Table 6). Tau-PET positivity was also predicted with high  
237 accuracy when using CSF stage 4 (MTBR-tau243 stage) as a threshold  
238 (AUC[95%CI]=0.95[0.93, 0.97], sensitivity=0.91 and specificity=0.92, second column  
239 Fig. 3B and Supplementary Table 6).

240 Ordinal logistic regression was used to assess the utility of CSF stages for predicting  
241 A/T status (*i.e.*, A-T-, A+T- or A+T+), and we calculated the c-index (an overall  
242 measure of discrimination equivalent to AUC for dichotomic outcomes) as a measure of  
243 accuracy. We observed that higher CSF stages were associated with higher predicted  
244 probabilities of being at more advanced A/T status (c-index[95%CI]=0.95[0.93, 0.97],  
245 last column Fig. 3B, and Supplementary Table 6). More specifically, participants at  
246 CSF stages 0 and 1 (negative biomarkers and A $\beta$ 42/40 stages) had the highest  
247 probability of being A-T-, at CSF stages 2 and 3 (pT217/T217 and pT205/T205 stages)  
248 being A+T- and at CSF stages 4 and 5 (MTBR-tau243 and total-tau stages) of being  
249 A+T+. Only one participant was classified as A-T+, which was excluded from this  
250 analysis.

251 Finally, we also aimed at investigating whether our staging model could be used as a  
252 diagnostic tool. In the first analysis, we used the CSF staging model for predicting  
253 cognitive stages within the AD continuum (*i.e.*, excluding non-AD). Higher CSF stages  
254 were associated with more advanced cognitive stages (c-index[95%CI]=0.88[0.86,  
255 0.91], first column Fig. 3C and Supplementary Table 6). The model predicted that  
256 participants at CSF stage 0 (negative biomarkers stage) had the highest probability of  
257 being CU-; at CSF stages 1 and 2 (A $\beta$ 42/40 and pT217/T217 stages) were more  
258 probably CU+ (as assessed by CSF), at CSF stage 3 (pT205/T205) MCI+ and, finally,  
259 at CSF stages 4 and 5 (MTBR-tau243 and total-tau) ADD+. Lastly, we aimed at  
260 differentiating cognitive impairment due to AD or due to other neurodegenerative  
261 diseases. We therefore compared patients with AD to patients with non-AD dementia,  
262 only including those with objective cognitive impairment (*i.e.*, MCI and dementia  
263 patients). Participants at CSF stage 2 (pT217/T217 stage) or higher with objective  
264 cognitive impairment had a high probability of having AD as the cause of their cognitive  
265 impairment (AUC[95%CI]=0.95[0.93, 0.98], sensitivity=0.97 and specificity=0.75, last  
266 column Fig. 3C-D and Supplementary Table 6).

267

### 268 **Longitudinal rates of change of AD biomarkers differ by CSF stages**

269 Next, we used longitudinal imaging and cognitive data to assess how AD biomarkers  
270 change over time based on the baseline CSF stage classification (Supplementary  
271 Table 7). The rate of accumulation of A $\beta$  aggregates as measured with PET (n=218)  
272 increased at early CSF stages reaching the highest values at CSF stage 2  
273 (pT217/T217 stage) and thereafter the rate decreased but still remained positive (Fig. 4  
274 and Supplementary Table 8). On the other hand, the tau-PET (n=312), cortical  
275 thickness (n=300) and mPACC (n=342) exhibited monotonic increases in rates of  
276 change over time, with the rates starting to be significantly different from contiguous



277 CSF stages at CSF stage 3 (pT205/T205 stage; Fig. 4). Figure 4B depicts that tau-  
278 PET, followed by mPACC had the highest rate of change (z-scored), while A $\beta$ -PET and  
279 cortical thickness had lower rates of change that were in a similar range.

280

### 281 **CSF biomarker stages predict clinical progression**

282 In the next set of analyses, we tested whether our CSF staging model was useful for  
283 predicting subsequent clinical progression (up to 5-years of follow-up after the baseline  
284 visit). First, we tested the ability of our model to predict progression to AD dementia  
285 from CU or MCI status at baseline (progressors: n=41). Based on Kaplan-Meier  
286 analyses (Fig. 5A), participants at higher CSF stages (4-5; MTBR-tau243 and total-tau  
287 stages) at baseline had higher probability to progress to AD dementia, than those at  
288 positive lower CSF stages (*i.e.*, 1-3). When adjusting for age, sex, and clinical status at  
289 baseline (*i.e.*, CU or MCI), the hazard ratio (HR) was 5.2 (95%CI: [2.2, 12.6],  $p < 0.001$ )  
290 when comparing participants at CSF stages 4 or 5 to participants at lower, but positive,  
291 CSF stages (1-3, A $\beta$ 42/40 to pT205/T205, reference; Fig. 5B and Supplementary Table  
292 9). When including only those with MCI at baseline (progressors: 38/88), we still found  
293 that those at CSF stages 4 or 5 at baseline had a significantly higher probability to  
294 progress to AD dementia (HR[95%CI]=4.5[1.8, 10.8],  $p < 0.001$ , Fig. 5C-D and  
295 Supplementary Table 9). Finally, we investigated the utility of the CSF staging model  
296 when predicting progression from CU to MCI status (progressors: 11/159). Again, those  
297 CU participants at higher CSF stages (4-5) at baseline, were much more prone to  
298 progress to MCI with a HR of 16.0 (95%CI: 3.2, 81.1,  $p < 0.001$ , Fig. 5E-F and  
299 Supplementary Table 9) compared to those in stage 1-3, supporting the clinical utility of  
300 the proposed staging model. There were no progressors from CSF stage 0 in any case,  
301 which prevented us from comparing these participants with the other CSF stages  
302 groups. Kaplan-Meier curves for each individual CSF stage are depicted in Ext Data  
303 Fig. 6.

304

### 305 **Replication in an independent cohort**

306 Finally, we replicated the staging model and the main analyses in the Charles F. and  
307 Joanne Knight Alzheimer's Disease Research Center (Knight-ADRC) cohort (n=222,  
308 Table 2). SuStaln selected one unique subtype as the optimal model with the same  
309 CSF abnormality ordering as the one previously obtained in BioFINDER-2 (Fig. 6A). In  
310 this cohort, however, there was slightly higher uncertainty between the ordering of first  
311 two (A $\beta$ 42/40 and pT217/T217) and the last two (MTBR-tau243 and total-tau) stages.  
312 These differences may be mostly due to the difference in sample size, especially in  
313 more advanced AD cases (only 9 mild AD dementia cases). Nonetheless, the overall

314 behaviour of these CSF biomarkers by the biomarker stages was similar to that in the  
315 main cohort (Fig. 6B and Supplementary Table 2). Further, the other AD biomarkers  
316 available (not included in the CSF staging model), showed similar trajectories to those  
317 in the discovery (BioFINDER-2) sample. A $\beta$ -PET was once again the first modality to  
318 cross the 1.96SD threshold at CSF stage 1 (A $\beta$ 42/Ab40 stage), followed by tau-PET in  
319 CSF stage 3 (pT205/T205 stage) and, finally, CSF NfL crossing this threshold at the  
320 final stage (total-tau stage; Fig. 6C and Supplementary Table 3). Neither the global  
321 cognitive composite nor AD cortical thickness signature crossed this threshold. The  
322 main difference compared with BioFINDER-2, was the lower degree of abnormality for  
323 all markers in the last CSF stages. This might be explained by the lower number of  
324 advanced patient cases in this cohort. The individual plots for each CSF and imaging  
325 biomarker by CSF stages are shown in Ext Data Fig. 7. Details of participants  
326 characteristics (Ext Data Fig. 2), tau-PET binding in different regions (Ext Data Figure 4  
327 and Supplementary Table 4) and other cognitive measures (Ext Data Figure 5 and  
328 Supplementary Table 5) per CSF stage can be found in the Ext Data. Stability  
329 analyses, within participants with available longitudinal CSF measures (n=51,  
330 Supplementary Table 10), also showed that most participants remained at the same  
331 stage (n=46, 90.2%) or progressed (n=4, 7.8%) at follow-up (Ext Data Fig. 3C-D).

332 We also calculated the optimal CSF stages for predicting A $\beta$ -PET and tau-PET  
333 positivity using ROC curves. As in the case of BioFINDER-2, CSF stage 2 (pT217/T217  
334 stage) was optimal for predicting A $\beta$ -PET positivity (AUC[95%CI]=0.89[0.85, 0.94], Fig.  
335 6D&G and Supplementary Table 6), whereas CSF stage 4 (MTBR-tau243 stage) was  
336 optimal for predicting tau-PET positivity (AUC[95%CI]=0.94[0.91, 0.96], Fig. 6E&H).  
337 Consistent with findings in BioFINDER-2, higher CSF stages were predictive of more  
338 advanced A/T stages, as assessed by PET (c-index[95%CI]=0.89[0.86, 0.92], Fig. 6  
339 F&I, Supplementary Table 6). Being at CSF stages 0 and 1 (biomarker negative and  
340 A $\beta$ 42/40 stage) was highly predictive of being A-T-, being at CSF stages 2 and 3  
341 (pT217/T217 and pT205/T205 stages) was predictive of being A+T- and, at CSF  
342 stages 4 and 5 (MTBR-tau243 and total-tau stages) of being A+T+.

343 Finally, we investigated the prognostic capacity of our model for predicting progression  
344 to CDR $\geq$ 1 (AD dementia, progressors: 41/218) and CDR $\geq$ 0.5 (MCI or very mild AD  
345 dementia, progressors: 30/214). We found that CU (CDR=0) and very mild AD  
346 (CDR=0.5) participants at the highest CSF stages (4-5; MTBR-tau243 and total-tau  
347 stages) exhibited an increased risk (HR[95%CI]=6.9[3.0, 16.0], p<0.001) of progressing  
348 to AD dementia (CDR $\geq$ 1) at follow-up, even when adjusting for age, sex and clinical  
349 status (*i.e.*, CDR=0 or CDR=0.5) at baseline, compared to participants at CSF stages

350 1-3 (Fig. 6J-K and Supplementary Table 9). Similarly, CU participants at higher CSF  
351 stages (*i.e.*, 4-5) had higher risk (HR[95%CI]=4.2[2.0, 8.8],  $p<0.001$ ) of progressing to  
352 very mild AD or more advanced disease stages when compared to participants at  
353 lower, but positive, CSF stages (1-3, Fig. 6L-M and Supplementary Table 9). In this  
354 case, participants at CSF stages 1-3 also showed significant higher risk to progress to  
355 CDR $\geq$ 0.5 than those at CSF stage 0 (HR[95%CI]=5.0[1.6, 15.0],  $p=0.005$ ). There were  
356 no progressors to CDR $\geq$ 1 at CSF stage 0, which prevented us to compare this group to  
357 the others. Kaplan-Meier curves for each individual CSF stage are depicted in Ext Data  
358 Fig. 6.

359

## 360 Discussion

361 In this study, we created and evaluated a staging model for AD using five CSF  
362 biomarkers reflecting abnormalities of soluble A $\beta$  and different soluble tau species. We  
363 have demonstrated that a single CSF collection is sufficient to accurately stage  
364 participants representing the entire AD *continuum*. This is possible because CSF  
365 biomarker abnormalities followed a stereotypical trajectory in all participants, which  
366 enabled a single staging model usable for everyone. Notably, we have been able to  
367 relate the CSF stages of our model to abnormality in other well-described AD  
368 biomarkers, such as A $\beta$ -PET, tau-PET, MRI and in cognitive measures. Further, our  
369 CSF staging model was able to accurately predict positivity of the imaging biomarkers  
370 of A $\beta$  and tau, and to predict A/T status, as assessed by PET. The CSF staging model  
371 was also related to cognitive stages and was able to differentiate cognitive impairment  
372 due to AD from other dementias. Importantly, we also observed different longitudinal  
373 rates of change of AD biomarkers at different CSF stages, which may allow us to  
374 determine which participants will progress more in key aspects of the disease. We also  
375 showed that participants in the more advanced stages of our CSF-based model were at  
376 higher risk for clinical decline. And, finally, we were able to replicate the model and  
377 main results in an independent cohort. Altogether, these results prove the validity and  
378 clinical utility of our CSF staging model, suggesting that it may hold promise for both  
379 clinical practice and in clinical trials<sup>44</sup>.

380 The first aim of this analysis sought to establish whether there was a stereotypic  
381 ordering in when key CSF biomarkers become abnormal. SuStaln is an optimal  
382 approach to solve this question, as it allows the modelling of different trajectories, if  
383 existent, using cross-sectional data<sup>41</sup>, as has been successfully applied to imaging  
384 biomarkers<sup>35,36,45</sup>. We observed that the CSF biomarkers investigated in this study  
385 became abnormal in a particular sequence, and more importantly, that this sequence

386 did not vary systematically across participants. This result is important by itself as it  
387 tells us that there may be a single cascade of events that leads to sequential  
388 abnormality of these soluble proteins in the brain, common to all AD patients. Previous  
389 studies already suggested that changes in the levels of tau fragments phosphorylated  
390 at different sites may be linked mechanistically and could be associated with disease  
391 stages<sup>46-50</sup>. Based on our results, A $\beta$  plaques reflected by an imbalance of soluble  
392 amyloid species (*i.e.*, low A $\beta$ 42/40) may drive hyper-phosphorylation of tau in early  
393 phosphorylation site (pT217/T217), as previously suggested by human and animal  
394 data<sup>51,52</sup>, which would subsequently be followed by hyper-phosphorylation in later site  
395 (pT205/T205) and eventually increase other tau fragments (MTBR-tau243 and total  
396 tau) due to tangles formation and neurodegeneration, respectively. Notably, this  
397 sequence of events is in line with previous literature<sup>53,54</sup>, and demonstrates that late  
398 onset sporadic AD molecular pathway matches the same sequence of events as  
399 autosomal dominant AD<sup>29</sup>. Exploring in detail this cascade of events may provide  
400 mechanistic insights into disease pathology and progression. And, in turn, could have  
401 important consequences in drug development, as targeting some of the earliest events  
402 of this sequence may stop or reduce subsequent events in the cascade and thereby  
403 having a significant effect on tau aggregation<sup>46,50,55</sup>.

404 Nonetheless, perhaps the most important result of our study was proving the utility of a  
405 CSF model as a method to stage AD *in vivo*<sup>44</sup>. In our model, CSF stages could be  
406 related to main molecular changes and clinical tipping points in the course of the  
407 disease, including abnormal levels of deposited A $\beta$  (CSF stage 2:  
408 pT217/T217)<sup>19,20,23,25,26,28,29,32</sup> and tau (CSF stages 3: pT205/T205<sup>28,29,32</sup>), early cognitive  
409 impairment (CSF stage 4: MTBR-tau243<sup>32</sup>) and neurodegeneration (CSF stage 5: total  
410 tau<sup>42</sup>), following the expected pattern. With the objective of characterizing the molecular  
411 status of the participants using our model, we observed that participants at CSF stages  
412 2 and 3 (pT217/T217 and pT205/T205 stages) could be categorized with high accuracy  
413 as being A $\beta$ -positive and tau-negative by PET (A+T-), while participants at CSF stage 4  
414 (MTBR-tau243) or higher were A $\beta$ - and tau-PET positive (A+T+)<sup>42</sup>. Importantly, these  
415 cut-points were reproduced in the Knight-ADRC cohort, even using different PET  
416 tracers and quantification methods supporting the consistency of the model. Being able  
417 to accurately assess A $\beta$  and tau status with a single CSF collection may be very useful  
418 to select the optimal participants for a clinical trial, such as has been done in the  
419 donanemab trial (NCT03367403)<sup>11</sup>, without the need of acquiring both an A $\beta$ -PET and  
420 tau-PET scan to determine if a patient is eligible for treatment. In BioFINDER-2, we  
421 also observed the diagnostic utility of this CSF staging model, as it was able to  
422 accurately discern AD from non-AD related cognitive impairment, and could

423 differentiate cognitive stages. Thus, the use of our model as a diagnostic tool may have  
424 important consequences also at the clinical level.

425 Notably, our CSF staging model also showed prognostic utility. First, we observed that  
426 participants at different CSF stages showed different rates of change in multiple  
427 biomarkers. For instance, rates of A $\beta$  accumulation across CSF stages showed the  
428 previously reported inverted U shape<sup>3,56</sup>, with participants at CSF stage 2 (pT217/T217)  
429 exhibiting the highest rates of change. On the other hand, the other imaging  
430 biomarkers and cognitive scores showed increased rate of change with increasing CSF  
431 stages, only plateauing at the last stage, as expected<sup>57</sup>. These results support the use  
432 of our staging model as an enrichment technique for clinical trials<sup>58</sup>. But, more  
433 importantly, we also observed that the CSF staging model was able to predict clinical  
434 progression. Being at the later stages of our model, increased the risk of progressing to  
435 AD dementia, even when accounting for cognitive status at baseline (Fig. 5). Further,  
436 we also observed a higher risk of progressing to MCI or very mild AD, although this  
437 analysis should be replicated in larger cohorts with longer follow-up. Notably, the  
438 prognostic ability of our CSF staging model was replicated in the Knight-ADRC cohort.  
439 These results suggest a clear prognostic utility on staging participants based on their  
440 CSF profile, which may imply significant reductions in costs and complexity compared  
441 to previous staging methods based on PET<sup>34,36,37,59</sup>.

442 Importantly, we view the present model as a first step toward providing meaningful  
443 disease progression staging using a single CSF measurement<sup>44</sup>. We expect that  
444 additional biomarkers will be included to the model to either gain further granularity in  
445 specific disease stages, or to signify to other pathophysiological events (*e.g.*, microglial  
446 reactivity)<sup>60</sup>. Being able to measure several pathophysiological abnormalities using one  
447 sample is one of the main advantages of using fluid samples instead of PET for  
448 staging. Another advantage of this model is that financial and infrastructure cost of CSF  
449 is low compared to other measures, such as PET. Looking toward the future, we hope  
450 to be able translate these results into plasma biomarkers, which would facilitate even  
451 greater availability and cost-effectiveness. Widespread use of our fluid biomarker  
452 staging model in primary care would likely require replacing CSF measures with  
453 plasma measures without greatly sacrificing model performance. Efforts in this direction  
454 are currently underway, but development of reliable plasma assays for pT205/T205  
455 and MTBR-tau243 are still ongoing.

456 This study has several strengths but also some limitations. The main strength of this  
457 study is the proven utility of the model, which was replicated in an independent cohort,  
458 and thereby supports the generalizability of our staging model. Another important  
459 strength is the use of several biomarkers measured with very high-performing

460 assays<sup>28,61</sup>, which is crucial for the accurate assessment of pathology<sup>4</sup>. However, some  
461 limitations must be recognized. Although we included CSF biomarkers with proven  
462 utility, we acknowledge that there are some other interesting markers, such as p-  
463 tau235<sup>62</sup>, that have not been analyzed in this study. However, we think that our CSF  
464 staging model in its current form was still successful at signaling the main inflection  
465 points of the disease. Further, p-tau231, which is thought to become abnormal early in  
466 the disease<sup>20-22</sup>, although not always<sup>25,61</sup>, was excluded from our model as it followed a  
467 similar abnormality tendency as pT217/T217, without providing better performance for  
468 staging than the later. We hypothesize that this may be in part related to difference in  
469 analytical performances, as the mass spectrometry platform used in our study provided  
470 rather higher coefficient of variation for pT231/T231 measurements (12-18% compared  
471 to 5-7% for pT217/T217). Future studies in earlier cohorts or with optimized assays for  
472 measuring p-tau231 should test whether the present model could be improved. Another  
473 important issue is that we acknowledge that CSF collection require trained clinicians,  
474 and we plan to move towards a plasma-based staging models when these biomarkers  
475 become available. A replication of these results in a more diverse population is also  
476 needed to confirm the utility of our model in a less selected population. We would also  
477 like to point out that the CSF stages proposed here are related to events of the disease  
478 and not to time. Thus, it may be possible that the time for progressing from one CSF  
479 stage to the next vary significantly depending on the CSF stage at baseline.

480 In conclusion, in this study we have developed an accurate staging model for AD  
481 based on only five CSF biomarkers, and we have evaluated it in two large independent  
482 cohorts. We have shown that the model is stable, and accurately reflects biomarker  
483 changes in AD, providing an easier and cheaper method for characterization of  
484 participants for both clinical setting and trials. Further, our model has demonstrated its  
485 utility for prognosis, being able to identify participants with more pronounced  
486 longitudinal changes in AD biomarkers as well as those individuals with higher risk of  
487 deteriorating in cognitive status. This CSF staging model may be a useful, cheap, and  
488 accessible method in clinical trials for optimal selection of study participants and as a  
489 surrogate outcome measure. Further, the staging model has great potential for use in  
490 clinical practice in the diagnostic and prognostic work-up of patients with cognitive  
491 symptoms and potentially also for selecting optimal candidates for disease-modifying  
492 treatments. And we expect it may have an influence on the update of the A/T/(N)  
493 criteria.<sup>42</sup> Altogether, our staging model may be an important step towards a more  
494 sophisticated personalized medicine approach of AD, which will be key with the  
495 advancement of novel disease-modifying treatments.

496

497 **DATA AVAILABILITY:**

498 The datasets generated and/or analyzed during the current study are available from the  
499 authors (O.H and R.J.B). We will share datasets within the restrictions of IRB ethics  
500 approvals, upon reasonable request.

501 For BioFINDER-2 data, anonymized data will be shared by request from a qualified  
502 academic investigator for the sole purpose of replicating procedures and results  
503 presented in the article and as long as data transfer is in agreement with EU legislation  
504 on the general data protection regulation and decisions by the Ethical Review Board of  
505 Sweden and Region Skåne, which should be regulated in a material transfer  
506 agreement.

507

508

509 **DISCLOSURES**

510 OH has acquired research support (for the institution) from ADx, AVID  
511 Radiopharmaceuticals, Biogen, Eli Lilly, Eisai, Fujirebio, GE Healthcare, Pfizer, and  
512 Roche. In the past 2 years, he has received consultancy/speaker fees from AC  
513 Immune, Amylyx, Alzpath, BioArctic, Biogen, Cerveau, Eisai, Eli Lilly, Fujirebio,  
514 Genentech, Merck, Novartis, Novo Nordisk, Roche, Sanofi and Siemens. JWV is  
515 supported by the SciLifeLab & Wallenberg Data Driven Life Science Program (grant:  
516 KAW 2020.0239). KH is an Eisai-sponsored voluntary research associate professor at  
517 Washington University and has received salary from Eisai. Washington University,  
518 RJB, and DMH have equity ownership interest in C2N Diagnostics. RJB. and DMH  
519 receive income from C2N Diagnostics for serving on the scientific advisory board. KH,  
520 NRB, and RJB. may receive income based on technology (METHODS TO DETECT  
521 MTBR TAU ISOFORMS AND USE THEREOF) licensed by Washington University to  
522 C2N Diagnostics. DMH may receive income based on technology (ANTIBODIES TO  
523 MID-DOMAIN OF TAU) licensed by Washington University to C2N Diagnostics. RJB  
524 has received honoraria as a speaker, consultant, or advisory board member from  
525 Amgen and Roche. DMH is on the scientific advisory board of Genentech, Denali, and  
526 Cajal Neurosciences, and consults for Alector and Asteroid. NRB is co-inventor on the  
527 following US patent applications: 'Methods to detect novel tau species in CSF and use  
528 thereof to track tau neuropathology in Alzheimer's disease and other tauopathies'  
529 (PCT/US2020/046224); 'CSF phosphorylated tau and amyloid beta profiles as  
530 biomarkers of tauopathies' (PCT/US2022/022906); and 'Methods of diagnosing and  
531 treating based on site-specific tau phosphorylation' (PCT/US2019/030725). NRB may  
532 receive a royalty income based on technology licensed by Washington University to  
533 C2N Diagnostics.

534

535

536

537 **FUNDING**

538 The BioFINDER study was supported by the Swedish Research Council (2022-00775),  
539 ERA PerMed (ERAPERMED2021-184), the Knut and Alice Wallenberg foundation  
540 (2017-0383), the Strategic Research Area MultiPark (Multidisciplinary Research in  
541 Parkinson's disease) at Lund University, the Swedish Alzheimer Foundation (AF-  
542 980907), the Swedish Brain Foundation (FO2021-0293), The Parkinson foundation of  
543 Sweden (1412/22), the Cure Alzheimer's fund, the Konung Gustaf V:s och Drottning  
544 Victorias Frimurarestiftelse, the Skåne University Hospital Foundation (2020-O000028),  
545 Regionalt Forskningsstöd (2022-1259) and the Swedish federal government under the  
546 ALF agreement (2022-Projekt0080). The precursor of <sup>18</sup>F-flutemetamol was sponsored  
547 by GE Healthcare. The precursor of <sup>18</sup>F-RO948 was provided by Roche. GS received  
548 funding from the European Union's Horizon 2020 research and innovation program  
549 under the Marie Skłodowska-Curie action grant agreement No 101061836, from an  
550 Alzheimer's Association Research Fellowship (#AARF-22-972612), Greta och Johan  
551 Kocks research grants and, travel grants from the Strategic Research Area MultiPark  
552 (Multidisciplinary Research in Parkinson's disease) at Lund University.

553 This work was supported by resources and effort provided by the Tracy Family SILQ  
554 Center (PI: RJB) established by the Tracy Family, Richard Frimel and Gary Werths,  
555 GHR Foundation, David Payne, and the Willman Family brought together by The  
556 Foundation for Barnes-Jewish Hospital. This work was also supported by resources  
557 and effort provided by the Hope Center for Neurological Disorders and the Department  
558 of Neurology at the Washington University School of Medicine. This work was also  
559 supported by the Clinical, Fluid Biomarker, and Imaging Cores of the Knight ADRC  
560 (P30 AG066444 [PI: JCM], P01 AG03991 [PI: JCM], and P01 AG026276 [PI: JCM]) at  
561 the Washington University School of Medicine for participant evaluation, samples, and  
562 data collection. The mass spectrometry analyses of BioFINDER-2 and Knight ADRC  
563 samples were supported by Eisai industry grant to Washington University (PI: KH and  
564 RJB) and the Knight ADRC developmental project (PI: NRB) and R01AG070941 (PI:  
565 SES).

566

567

568 The funding sources had no role in the design and conduct of the study; in the  
569 collection, analysis, interpretation of the data; or in the preparation, review, or approval  
570 of the manuscript.

571

572



573  
574

## 575 References

- 576 1. GBD 2019 Dementia Forecasting Collaborators. Estimation of the global  
577 prevalence of dementia in 2019 and forecasted prevalence in 2050: an analysis  
578 for the Global Burden of Disease Study 2019. *Lancet Public Health* **7**, e105–e125  
579 (2022).
- 580 2. Scheltens, P. *et al.* Alzheimer's disease. *Lancet* **388**, 505–17 (2016).
- 581 3. Villemagne, V. L. *et al.* Amyloid- $\beta$  deposition, neurodegeneration, and cognitive  
582 decline in sporadic Alzheimer's disease: A prospective cohort study. *Lancet*  
583 *Neurol* **12**, 357–367 (2013).
- 584 4. Hansson, O. Biomarkers for neurodegenerative diseases. *Nature Medicine* vol.  
585 27 954–963 Preprint at <https://doi.org/10.1038/s41591-021-01382-x> (2021).
- 586 5. Leuzy, A. *et al.* Biomarker-Based Prediction of Longitudinal Tau Positron  
587 Emission Tomography in Alzheimer Disease. *JAMA Neurol* **79**, 149 (2022).
- 588 6. Mattsson-Carlsson, N. *et al.* Prediction of Longitudinal Cognitive Decline in  
589 Preclinical Alzheimer Disease Using Plasma Biomarkers. *JAMA Neurol* (2023)  
590 doi:10.1001/jamaneurol.2022.5272.
- 591 7. Salvadó, G. *et al.* Optimal combinations of CSF biomarkers for predicting  
592 cognitive decline and clinical conversion in cognitively unimpaired participants  
593 and mild cognitive impairment patients: A multi-cohort study. *Alzheimer's &*  
594 *Dementia* (2023) doi:10.1002/alz.12907.
- 595 8. Ossenkoppele, R. *et al.* Accuracy of Tau Positron Emission Tomography as a  
596 Prognostic Marker in Preclinical and Prodromal Alzheimer Disease. *JAMA Neurol*  
597 **78**, 961 (2021).
- 598 9. van Dyck, C. H. *et al.* Lecanemab in Early Alzheimer's Disease. *New England*  
599 *Journal of Medicine* **388**, 9–21 (2023).
- 600 10. Cummings, J. *et al.* Aducanumab: Appropriate Use Recommendations Update. *J*  
601 *Prev Alzheimers Dis* (2022) doi:10.14283/jpad.2022.34.
- 602 11. Mintun, M. A. *et al.* Donanemab in Early Alzheimer's Disease. *New England*  
603 *Journal of Medicine* **384**, 1691–1704 (2021).
- 604 12. Mielke, M. M. *et al.* Performance of plasma phosphorylated tau 181 and 217 in  
605 the community. *Nat Med* **28**, 1398–1405 (2022).
- 606 13. Thijssen, E. H. *et al.* Plasma phosphorylated tau 217 and phosphorylated tau 181  
607 as biomarkers in Alzheimer's disease and frontotemporal lobar degeneration: a  
608 retrospective diagnostic performance study. *Lancet Neurol* **20**, 739–752 (2021).
- 609 14. Thijssen, E. H. *et al.* Diagnostic value of plasma phosphorylated tau181 in  
610 Alzheimer's disease and frontotemporal lobar degeneration. *Nat Med* **26**, 387–  
611 397 (2020).
- 612 15. Suárez-calvet, M. *et al.* Novel tau biomarkers phosphorylated at T 181 , T 217 ,  
613 or T 231 rise in the initial stages of the preclinical Alzheimer ' s continuum when  
614 only subtle changes in A  $\beta$  pathology are detected. *EMBO Mol Med* 1–19 (2020)  
615 doi:10.15252/emmm.202012921.
- 616 16. Karikari, T. K. *et al.* Blood phosphorylated tau 181 as a biomarker for Alzheimer's  
617 disease: a diagnostic performance and prediction modelling study using data  
618 from four prospective cohorts. *Lancet Neurol* **19**, 422–433 (2020).
- 619 17. Brier, M. R. *et al.* *Tau and Ab imaging, CSF measures, and cognition in*  
620 *Alzheimer's disease*. <https://www.science.org>.

- 621 18. Janelidze, S. *et al.* Associations of Plasma Phospho-Tau217 Levels with Tau  
622 Positron Emission Tomography in Early Alzheimer Disease. *JAMA Neurol* **78**,  
623 149–156 (2021).
- 624 19. Palmqvist, S. *et al.* Discriminative Accuracy of Plasma Phospho-tau217 for  
625 Alzheimer Disease vs Other Neurodegenerative Disorders. *JAMA* **324**, 772–781  
626 (2020).
- 627 20. Milà-Alomà, M. *et al.* Plasma p-tau231 and p-tau217 as state markers of  
628 amyloid- $\beta$  pathology in preclinical Alzheimer's disease. *Nat Med* **28**, 1797–1801  
629 (2022).
- 630 21. Ashton, N. J. *et al.* Plasma p-tau231: a new biomarker for incipient Alzheimer's  
631 disease pathology. *Acta Neuropathol* **141**, 709–724 (2021).
- 632 22. Ashton, N. J. *et al.* Cerebrospinal fluid p-tau231 as an early indicator of emerging  
633 pathology in Alzheimer's disease. *EBioMedicine* **76**, 103836 (2022).
- 634 23. Therriault, J. *et al.* Association of Phosphorylated Tau Biomarkers With Amyloid  
635 Positron Emission Tomography vs Tau Positron Emission Tomography. *JAMA*  
636 *Neurol* (2022) doi:10.1001/jamaneurol.2022.4485.
- 637 24. Murray, M. E. *et al.* Global neuropathologic severity of Alzheimer's disease and  
638 locus coeruleus vulnerability influences plasma phosphorylated tau levels. *Mol*  
639 *Neurodegener* **17**, 85 (2022).
- 640 25. Salvadó, G. *et al.* Specific associations between plasma biomarkers and  
641 postmortem amyloid plaque and tau tangle loads. *EMBO Mol Med* (2023)  
642 doi:10.15252/emmm.202217123.
- 643 26. Mattsson-Carlgen, N. *et al.* Longitudinal plasma p-tau217 is increased in early  
644 stages of Alzheimer's disease. *Brain* **143**, 3234–3241 (2020).
- 645 27. Ashton, N. J. *et al.* Differential roles of A $\beta$ 42/40, p-tau231 and p-tau217 for  
646 Alzheimer's trial selection and disease monitoring. *Nat Med* (2022)  
647 doi:10.1038/s41591-022-02074-w.
- 648 28. Barthélemy, N. R., Saef, B., Li, Y. & Gordon, B. A. The relationships of CSF tau  
649 phosphorylation with amyloid PET, tau PET, and symptomatic Alzheimer  
650 disease. *Nat Med* (2023).
- 651 29. Barthélemy, N. R. *et al.* A soluble phosphorylated tau signature links tau,  
652 amyloid and the evolution of stages of dominantly inherited Alzheimer's  
653 disease. *Nat Med* **26**, 398–407 (2020).
- 654 30. Gobom, J. *et al.* Antibody-free measurement of cerebrospinal fluid tau  
655 phosphorylation across the Alzheimer's disease continuum. *Mol Neurodegener*  
656 **17**, 81 (2022).
- 657 31. Horie, K., Barthélemy, N. R., Sato, C. & Bateman, R. J. CSF tau microtubule  
658 binding region identifies tau tangle and clinical stages of Alzheimer's disease.  
659 *Brain* **144**, 515–527 (2021).
- 660 32. Horie, K. *et al.* CSF MTBR-tau243 is a specific biomarker of tau pathology in  
661 Alzheimer's disease.
- 662 33. Grothe, M. J. *et al.* In vivo staging of regional amyloid deposition. *Neurology* **89**,  
663 2031–2038 (2017).
- 664 34. Mattsson, N., Palmqvist, S., Stomrud, E., Vogel, J. & Hansson, O. Staging  $\beta$ -  
665 Amyloid Pathology with Amyloid Positron Emission Tomography. *JAMA Neurol*  
666 **76**, 1319–1329 (2019).

- 667 35. Collij, L. E. *et al.* Multitracer model for staging cortical amyloid deposition using  
668 PET imaging. *Neurology* **95**, e1538–e1553 (2020).
- 669 36. Vogel, J. W. *et al.* Four distinct trajectories of tau deposition identified in  
670 Alzheimer’s disease. *Nat Med* **27**, 871–881 (2021).
- 671 37. Pascoal, T. A. *et al.* 18F-MK-6240 PET for early and late detection of  
672 neurofibrillary tangles. *Brain* **143**, 2818–2830 (2020).
- 673 38. Therriault, J. *et al.* Biomarker modeling of Alzheimer’s disease using PET-based  
674 Braak staging. *Nat Aging* **2**, 526–535 (2022).
- 675 39. Ferreira, D., Nordberg, A. & Westman, E. Biological subtypes of Alzheimer  
676 disease. *Neurology* **94**, 436–448 (2020).
- 677 40. Murray, M. E. *et al.* Neuropathologically defined subtypes of Alzheimer’s disease  
678 with distinct clinical characteristics: a retrospective study. *Lancet Neurol* **10**,  
679 785–796 (2011).
- 680 41. Young, A. L. *et al.* Uncovering the heterogeneity and temporal complexity of  
681 neurodegenerative diseases with Subtype and Stage Inference. *Nat Commun* **9**,  
682 4273 (2018).
- 683 42. Jack, C. R. *et al.* A/T/N: An unbiased descriptive classification scheme for  
684 Alzheimer disease biomarkers. *Neurology* **87**, 539–547 (2016).
- 685 43. Cho, H. *et al.* In vivo cortical spreading pattern of tau and amyloid in the  
686 Alzheimer disease spectrum. *Ann Neurol* **80**, 247–258 (2016).
- 687 44. Therriault, J. *et al.* Staging of Alzheimer’s disease: past, present, and future  
688 perspectives. *Trends in Molecular Medicine* vol. 28 726–741 Preprint at  
689 <https://doi.org/10.1016/j.molmed.2022.05.008> (2022).
- 690 45. Archetti, D. *et al.* Inter-cohort validation of sustain model for alzheimer’s  
691 disease. *Front Big Data* **4**, (2021).
- 692 46. Wesseling, H. *et al.* Tau PTM Profiles Identify Patient Heterogeneity and Stages  
693 of Alzheimer’s Disease. *Cell* **183**, 1699-1713.e13 (2020).
- 694 47. Augustinack, J. C., Schneider, A., Mandelkow, E. M. & Hyman, B. T. Specific tau  
695 phosphorylation sites correlate with severity of neuronal cytopathology in  
696 Alzheimer’s disease. *Acta Neuropathol* **103**, 26–35 (2002).
- 697 48. Zheng-Fischhöfer, Q. *et al.* Sequential phosphorylation of Tau by glycogen  
698 synthase kinase-3beta and protein kinase A at Thr212 and Ser214 generates the  
699 Alzheimer-specific epitope of antibody AT100 and requires a paired-helical-  
700 filament-like conformation. *Eur J Biochem* **252**, 542–52 (1998).
- 701 49. Luna-Muñoz, J., Chávez-Macías, L., García-Sierra, F. & Mena, R. Earliest Stages of  
702 Tau Conformational Changes are Related to the Appearance of a Sequence of  
703 Specific Phospho-Dependent Tau Epitopes in Alzheimer’s Disease1. *Journal of*  
704 *Alzheimer’s Disease* **12**, 365–375 (2007).
- 705 50. Stefanoska, K. *et al.* Alzheimer’s disease: Ablating single master site abolishes  
706 tau hyperphosphorylation. *Sci. Adv* vol. 8 <https://www.science.org> (2022).
- 707 51. Mattsson-Carlgrén, N. *et al.* Soluble P-tau217 reflects amyloid and tau pathology  
708 and mediates the association of amyloid with tau. *EMBO Mol Med* **13**, (2021).
- 709 52. Mattsson-Carlgrén, N. *et al.* A $\beta$  deposition is associated with increases in soluble  
710 and phosphorylated tau that precede a positive Tau PET in Alzheimer’s disease.  
711 *Sci Adv* **6**, (2020).
- 712 53. Bateman, R. J. *et al.* Clinical and Biomarker Changes in Dominantly Inherited  
713 Alzheimer’s Disease. *New England Journal of Medicine* **367**, 795–804 (2012).

- 714 54. Jack, C. R. Jr. *et al.* Tracking pathophysiological processes in Alzheimer's disease:  
715 an updated hypothetical model of dynamic biomarkers. *Lancet Neurology* **68**,  
716 497–501 (2013).
- 717 55. Bancher, C. *et al.* Accumulation of abnormally phosphorylated  $\tau$  precedes the  
718 formation of neurofibrillary tangles in Alzheimer's disease. *Brain Res* **477**, 90–99  
719 (1989).
- 720 56. Jack, C. R. *et al.* Brain  $\beta$ -amyloid load approaches a plateau. *Neurology* **80**, 890–  
721 896 (2013).
- 722 57. Krishnadas, N. *et al.* Rates of regional tau accumulation in ageing and across the  
723 Alzheimer's disease continuum: an AIBL 18F-MK6240 PET study. *EBioMedicine*  
724 **88**, 104450 (2023).
- 725 58. Ossenkoppele, R., van der Kant, R. & Hansson, O. Tau biomarkers in Alzheimer's  
726 disease: towards implementation in clinical practice and trials. *Lancet Neurol*  
727 (2022) doi:10.1016/S1474-4422(22)00168-5.
- 728 59. Collij, L. E. *et al.* Visual assessment of [18F]flutemetamol PET images can detect  
729 early amyloid pathology and grade its extent. *Eur J Nucl Med Mol Imaging*  
730 (2021) doi:10.1007/s00259-020-05174-2.
- 731 60. Hampel, H. *et al.* Developing the ATX(N) classification for use across the  
732 Alzheimer disease continuum. *Nat Rev Neurol* **17**, 580–589 (2021).
- 733 61. Janelidze, S. *et al.* Head-to-head comparison of 10 plasma phospho-tau assays in  
734 prodromal Alzheimer's disease. (2022).
- 735 62. Lantero-Rodriguez, J. *et al.* P-tau235: a novel biomarker for staging preclinical  
736 Alzheimer's disease. *EMBO Mol Med* **13**, (2021).
- 737 63. American Psychiatric Association. *Diagnostic and Statistical Manual of Mental*  
738 *Disorders*. (American Psychiatric Association, 2013).  
739 doi:10.1176/appi.books.9780890425596.
- 740 64. Jack, C. R. *et al.* NIA-AA Research Framework: Toward a biological definition of  
741 Alzheimer's disease. *Alzheimer's & Dementia* **14**, 535–562 (2018).
- 742 65. Morris, J. C. The clinical dementia rating (cdr): Current version and scoring rules.  
743 *Neurology* **43**, 2412–2414 (1993).
- 744 66. Folstein, M. F., Folstein, S. E. & McHugh, P. R. 'Mini-mental state'. A practical  
745 method for grading the cognitive state of patients for the clinician. *J Psychiatr*  
746 *Res* **12**, 189–198 (1975).
- 747 67. Morris, J. C. *et al.* The Uniform Data Set (UDS): Clinical and Cognitive Variables  
748 and Descriptive Data From Alzheimer Disease Centers. *Alzheimer Dis Assoc*  
749 *Disord* **20**, 210–216 (2006).
- 750 68. Wisch, J. K. *et al.* Proteomic clusters underlie heterogeneity in preclinical  
751 Alzheimer's disease progression. *Brain* (2022) doi:10.1093/brain/awac484.
- 752 69. Aschenbrenner, A. J. *et al.* Comparison of plasma and CSF biomarkers in  
753 predicting cognitive decline. *Ann Clin Transl Neurol* **9**, 1739–1751 (2022).
- 754 70. Jack, C. R. *et al.* Defining imaging biomarker cut points for brain aging and  
755 Alzheimer's disease. *Alzheimer's and Dementia* **13**, 205–216 (2017).
- 756 71. Jack, C. R. *et al.* Different definitions of neurodegeneration produce similar  
757 amyloid/neurodegeneration biomarker group findings. *Brain* **138**, 3747–3759  
758 (2015).
- 759 72. Dincer, A. *et al.* APOE  $\epsilon$ 4 genotype, amyloid- $\beta$ , and sex interact to predict tau in  
760 regions of high APOE mRNA expression. *Sci Transl Med* **14**, (2022).

- 761 73. Klunk, W. E. *et al.* The Centiloid project: Standardizing quantitative amyloid  
762 plaque estimation by PET. *Alzheimer's and Dementia* **11**, 1-15.e4 (2015).
- 763 74. Su, Y. *et al.* Comparison of Pittsburgh compound B and florbetapir in  
764 cross-sectional and longitudinal studies. *Alzheimer's & Dementia: Diagnosis,  
765 Assessment & Disease Monitoring* **11**, 180–190 (2019).
- 766 75. Armitage, S. G. An analysis of certain psychological tests used for the evaluation  
767 of brain injury. *Psychol Monogr* **60**, i–48 (1946).
- 768 76. Donohue, M. C. *et al.* The Preclinical Alzheimer Cognitive Composite: Measuring  
769 Amyloid-Related Decline. *JAMA Neurol* **71**, 961–970 (2014).
- 770 77. Kaplan, E., Goodglass, H. & Weintraub, S. Boston naming test.
- 771 78. Grober, E., Buschke, H., Crystal, H., Bang, S. & Dresner, R. Screening for  
772 dementia by memory testing. *Neurology* **38**, 900–903 (1988).
- 773 79. Fonteijn, H. M. *et al.* An event-based model for disease progression and its  
774 application in familial Alzheimer's disease and Huntington's disease.  
775 *Neuroimage* **60**, 1880–1889 (2012).
- 776 80. Young, A. L. *et al.* A data-driven model of biomarker changes in sporadic  
777 Alzheimer's disease. *Brain* **137**, 2564–2577 (2014).
- 778 81. Aksman, L. M. *et al.* pySuStaln: A Python implementation of the Subtype and  
779 Stage Inference algorithm. *SoftwareX* **16**, 100811 (2021).
- 780 82. Kass, R. E. & Raftery, A. E. Bayes Factors. *J Am Stat Assoc* **90**, 773 (1995).
- 781 83. Hosmer, D. W., Lemeshow, S. & Sturdivant, R. X. *Applied Logistic Regression*.  
782 (Wiley, 2013). doi:10.1002/9781118548387.  
783  
784

## 785 **Online methods**

### 786 **Participants**

#### 787 *BioFINDER-2*

788 We assessed 426 participants from the Swedish BioFINDER-2 study  
789 (NCT03174938)<sup>19</sup>, with the complete set of CSF biomarkers available. Participants  
790 were recruited at Skåne University Hospital and the Hospital of Ängelholm in Sweden.  
791 These participants also had amyloid-PET (n=251), tau-PET (n=417), a magnetic  
792 resonance imaging (MRI, n=420) and cognitive assessment (n=426). Also, 220  
793 participants had available CSF biomarkers at follow-up (mean time (SD) = 2.05(0.22)  
794 years). Inclusion and exclusion criterion for this study has been detailed before<sup>19</sup>. In  
795 summary, CU participants do not fulfil criteria for MCI or dementia according to DSM-  
796 5<sup>63</sup>. Subjective cognitive decline (SCD) participants were considered as CU, in  
797 accordance with the research framework by the National Institute on Aging-Alzheimer's  
798 Association<sup>64</sup>. MCI participants had a MMSE score above 23, they did not fulfil the  
799 criteria for major neurocognitive disorder (dementia) according to DSM-5 and  
800 performed worse than -1.5 SD in at least one cognitive domain according to age and  
801 education stratified test norms. AD dementia was diagnosed according to the DSM-5  
802 criteria for major neurocognitive disorder due to AD and an abnormal biomarker for A $\beta$   
803 pathology was also required. Participants fulfilling the criteria for any other dementia  
804 were categorized as non-AD dementias, as previously described.<sup>19</sup>

#### 805 *Knight-ADRC*

806 Knight ADRC cohort consisted of community-dwelling volunteers enrolled in studies of  
807 memory and aging at Washington University in St. Louis. All Knight ADRC participants  
808 underwent a comprehensive clinical assessment that included a detailed interview of a  
809 collateral source, a neurological examination of the participant, the Clinical Dementia  
810 Rating (CDR<sup>®</sup>)<sup>65</sup> and the MMSE<sup>66</sup>. Individuals with a CDR of 0.5 or greater were  
811 considered to have a dementia syndrome and the probable aetiology of the dementia  
812 syndrome was formulated by clinicians based on clinical features in accordance with  
813 standard criteria and methods<sup>67</sup>. In Knight-ADRC cohort, participants were categorized  
814 as CU if they were scored CDR=0, either A $\beta$  negative or positive (CU- and CU+,  
815 respectively); very mild AD patients (CDR=0.5); and mild AD dementia patients  
816 (CDR $\geq$ 1) if clinical syndrome was typical of symptomatic AD. Participants with  
817 CDR $\geq$ 0.5 with different aetiology were assessed as being other dementia patients  
818 regardless of their amyloid status.

819 All participants gave written informed consent and ethical approval was granted by the  
820 Regional Ethical Committee in Lund, Sweden and the Washington University Human  
821 Research Protection Office, respectively.

822

### 823 **Fluid biomarkers**

824 Measurement of CSF tau species (*i.e.*, pT205/T205, pT217/T217, pT231/T231, MTBR-  
825 tau243 and total-tau [the residue 151-153]) was performed at Washington University in  
826 both cohorts using the newly developed IP/MS method, as previously detailed<sup>32</sup>. In  
827 BioFINDER-2, CSF levels of A $\beta$ 42/40 and NfL were measured using the Elecsys  
828 platform as previously explained<sup>19</sup>. A $\beta$  positivity was assessed using CSF A $\beta$ 42/40  
829 (<0.080), unless otherwise stated, based on Gaussian-mixture modeling. In Knight-  
830 ADRC, CSF A $\beta$ 42/40 levels were measured as explained previously<sup>28,68</sup>. The CSF A $\beta$ 42/40  
831 positivity threshold (0.0673) had the maximum combined sensitivity and specificity in  
832 distinguishing amyloid-PET status. CSF NfL was measured with a commercial ELISA kit  
833 (UMAN Diagnostics, Umea, Sweden), as explained previously<sup>69</sup>.

834

### 835 **Image acquisition and processing**

836 Image acquisition and processing details from BioFINDER-2 have been previously  
837 reported<sup>19</sup>. In brief, amyloid- and tau-PET were acquired using [<sup>18</sup>F]flutemetamol and  
838 [<sup>18</sup>F]RO948, respectively. Amyloid-PET binding was measured as SUVR using a  
839 neocortical meta-ROI, and with the cerebellar grey as a reference region. Of note, most  
840 of the AD dementia patients did not undergo amyloid-PET in BioFINDER-2, due to the  
841 study design. For main analyses, tau-PET binding was measured in a temporal meta-  
842 ROI<sup>70</sup>, which included, entorhinal, amygdala, parahippocampal, fusiform, inferior  
843 temporal, and middle temporal ROIs, using the inferior cerebellar cortex as reference  
844 region without partial volume correction. Additionally, tau-PET binding was also  
845 measured in regions covering early (Braak I), intermediate (Braak III-IV) and late  
846 (Braak V-VI) tau deposition areas<sup>43</sup>. For assessing cortical thickness, T1-weighted  
847 anatomical magnetization-prepared rapid gradient echo (MPRAGE) images (1mm  
848 isotropic voxels) were used. A cortical thickness meta-ROI was calculated including  
849 entorhinal, inferior temporal, middle temporal, and fusiform using FreeSurfer (v.6.0.  
850 <https://surfer.nmr.mgh.harvard.edu>) parcellation, which are areas known to be  
851 susceptible to AD-related atrophy<sup>71</sup>.

852 Methodological details for imaging processing and quantification for the Knight-ADRC  
853 cohort have been also previously reported<sup>71,72</sup>. In brief, MPRAGE data were processed  
854 using Freesurfer (v.5.3) to generate regions of interest. Amyloid-PET was acquired with  
855 either [<sup>11</sup>C]PIB or [<sup>18</sup>F]florbetapir and was quantified in a neocortical meta-ROI using  
856 cerebellar grey as a reference region. SUVR values were transformed to Centiloids<sup>73</sup> to  
857 allow direct comparison between tracers using previously validated transformations<sup>74</sup>.  
858 [<sup>18</sup>F]flortaucipir ([<sup>18</sup>F]AV1451) was used as a tau-PET tracer and images were



859 quantified in the same temporal meta-ROI as in BioFINDER-2 and assessed as  
860 positive if  $SUVR > 1.32$  based on previous work. The same additional regions as in  
861 BioFINDER-2 were also used to quantify tau-PET binding in early, intermediate, and  
862 late tau deposition regions. In all cases, cerebellar grey was used as a reference  
863 region. T1-weighted images were used to measure cortical thickness using the same  
864 approach as is in the BioFINDER-2 cohort.

865

### 866 **Neuropsychological testing**

867 mPACC and a global cognitive composite were used as the main cognitive outcome in  
868 BioFINDER-2 and Knight-ADRC participants, respectively. In BioFINDER-2  
869 participants, the mPACC-5 composite was calculated using mean of z-scores of  
870 Alzheimer's disease assessment scale (ADAS) delayed recall (weighted double),  
871 animal fluency, MMSE<sup>66</sup>, and trail making test-A (TMT-A)<sup>75</sup>, as a sensitive measure of  
872 early cognitive impairment<sup>76</sup>. Z-scores were calculated with a group of CU- as  
873 reference. Further, we also calculated several cognitive composites averaging z-scores  
874 of different cognitive tests. For the memory composite we used ADAS delayed and  
875 immediate word recall; for the executive function composite, we used TMT-A, TMT-B  
876 and symbol digit test; for the language composite we used the animal fluency test and  
877 the Boston naming test total score (BNT)<sup>77</sup>; and, finally for the visuo-spatial composite  
878 we used the visual object and space perception (VOSP) cube and letters tests.

879 In Knight-ADRC, the global cognitive composite was created using mean of z-scores of  
880 free and cued selective reminding test (FCSRT) free recall<sup>78</sup>, animal fluency, TMT-A  
881 and TMT-B. Z-scores were also calculated from a CU- group as a reference. For the  
882 executive function composite, we used TMT-A and TMT-B. We could not obtain any  
883 other cognitive composite similar to those derived in BioFINDER-2, due to lack of  
884 similar tests. However, we selected individual tests to try to recapitulate similar  
885 cognitive measures. For memory we used FCSRT, and for language we used animal  
886 fluency. No tests were available related visuo-spatial capacity.

887

### 888 **Model creation**

889 Model development was done with SuStaln<sup>41</sup> using cross-sectional data of amyloid-  
890 positive participants based on CSF A $\beta$ 42/40 levels. We selected these participants  
891 because we wanted to create a staging model focused on AD. SuStaln is a machine-  
892 learning technique that unravels temporal progression patterns (stages) allowing for  
893 multiple different trajectories (subtypes). For our purpose, we used the event-based  
894 model<sup>79</sup> (or mixture SuStaln<sup>80</sup>), in which the input data is the probability of each  
895 biomarker of being abnormal for each participant. In our case, we used a Gaussian-

896 mixture modelling approach (with 2 Gaussians) to obtain these probabilities. With this  
897 information, SuStaln provides the maximum likelihood sequence by which biomarkers  
898 become abnormal, and gives a probability for this ordering, for all subtypes. The  
899 number of SuStaln stages is defined by the number of biomarkers provided to the  
900 model (*i.e.*, one per biomarker plus a biomarker negative stage). The selection of the  
901 optimal number was determined using cross-validation, optimizing on cross-validation  
902 based information criterion (CVIC) and out-of-sample log-likelihood was calculated.  
903 The optimal number of subtypes was then selected based on these criteria, using the  
904 minimal number of subtypes that had the lowest CVIC and higher log-likelihood<sup>41</sup>. In  
905 this study, we used pySuStaln<sup>81</sup>, a Python implementation of the original method  
906 (downloaded 08/2022).

907 In our initial model with BioFINDER-2 participants, we included all biomarkers available  
908 and performed the cross-correlation in models with one, two and three subtypes.  
909 Although CVIC measures were lower in the three subtypes model, the similar log-  
910 likelihood in all three models, supported the one subtype model as the optimal one due  
911 to its lower complexity<sup>82</sup>. Upon examining the outcome of this model, we observed that  
912 pT217/T217, pT231/T231, and pT181/T181 position certainty was low, as they seemed  
913 to compete for the second position (Ext Data Fig. 1A). To avoid stages with low  
914 certainty, we decided to try to optimize this model through iterative removal of these  
915 biomarkers. All the possible combinations were created (*i.e.*, removing pT217/T217  
916 and/or pT231/T231 and/or pT181/T181) and compared using the CVIC (Ext Data Fig.  
917 1B). We observed that models including only one of these biomarkers (models 5-7)  
918 were better than those including two (models 2-4) or all three (model 1). Further,  
919 models including pT181/T181 performed worse, and those including pT217/T217  
920 performed better. Thus, the optimal model was selected as that including only  
921 pT217/T217 (model 7). Once the biomarkers to be included in the model were  
922 selected, we repeated the cross-validation with models up to three subtypes.  
923 Comparing CVIC and log-likelihood values, we once again selected the one subtype  
924 model as the optimal (Ext Data Fig. 1C). Based on this cross-validated model, we then  
925 staged all BioFINDER-2 participants.

926 For Knight-ADRC, we created the model from the biomarkers selected in the  
927 BioFINDER-2 cohort. To investigate whether one subtype was also the selected model,  
928 we run SuStaln and created cross-validated models for one to three subtypes. Again,  
929 based on CVIC (subtypes: 1=578.9; 2=598.1; 3=611.0) and log-likelihood (mean: 1=  
930 29.4; 2=-30.4; 3=-31.0), the less complex model (*i.e.*, one subtype) was selected as the  
931 optimal. We then staged all Knight-ADRC participants based on this cross-validated  
932 model.

933 As a sensitivity analysis, we compared the levels of the two biomarkers excluded  
934 (pT231/T231 and pT181/T181) with those of pT217/T217 in the optimal model. In  
935 summary, we observed that these biomarkers followed a similar trajectory across CSF  
936 stages as pT217/T217, although with lower increases in the two cohorts (Ext Data Fig.  
937 8A-B), which supports our decision of removing them from the model to have more  
938 stable and independent stages.

939

#### 940 **Statistical analyses**

941 All biomarkers were z-scored using participants older than 60 from the CU- group as a  
942 reference (BioFINDER-2: n=63 and Knight-ADRC: n=71). When necessary, biomarker  
943 data was inverted such that higher z-scores related to higher abnormality across all  
944 biomarkers. Differences in biomarkers by CSF stages were assessed using Kruskal-  
945 Wallis test. Wilcoxon-test was used for *post-hoc* comparisons adjusted for multiple  
946 comparisons with false discovery rate (FDR) correction (only differences in consecutive  
947 CSF stages are shown in figures). For categorical data (*i.e.*, sex, *APOE* carriership and  
948 diagnosis), we used chi-squared tests. LOESS regressions were used to fit the  
949 progression of biomarkers abnormalities across the CSF stages. ROC curves were  
950 used to assess the utility of CSF stages for predicting amyloid-PET, tau-PET positivity  
951 and to compare AD to non-AD objective cognitive impairment (MCI or dementia states).  
952 Maximization of Youden's index was used to select the optimal CSF stage cut-off in  
953 each case (*pROC* and *cutpointr* packages were used). For ordinal categories (*i.e.*, A/T  
954 status and diagnosis), ordinal logistic regression models were used (*MASS* and *lrm*  
955 packages). An equivalent measure to AUC, the c-index, was used to assess the  
956 performance of the CSF staging<sup>83</sup>. Confidence intervals were calculated using  
957 bootstrapping. Predicted probabilities of the outcome groups per each CSF stages  
958 were calculated using the *predict* function, Longitudinal rates of changes were  
959 calculated for every participant using linear regression models. One participant with a  
960 very negative rate of change in amyloid-PET (z-score < -1.8) was considered an outlier  
961 by visual inspection and excluded from the analysis. Kaplan-Meier curves were used to  
962 assess clinical progression using *survival* and *survminer* packages. Cox-proportional  
963 hazards model were used to calculate the risk of clinical progression adjusting for age  
964 and sex in all cases, and further baseline clinical status if necessary.

965 All analyses were performed with R (v.4.1.0). A two-sided p value < 0.05 was  
966 considered statistically significant.

967

968

969 **Tables**

|                                                     | <b>All<br/>(n=426)</b> | <b>CU-<br/>(n=80)</b> | <b>CU+<br/>(n=79)</b> | <b>MCI+<br/>(n=88)</b> | <b>ADD+<br/>(n=100)</b> | <b>nonAD<br/>(n=79)</b> |
|-----------------------------------------------------|------------------------|-----------------------|-----------------------|------------------------|-------------------------|-------------------------|
| <b>Age, years</b>                                   | 71.5 (8.5)             | 70.7 (9.5)            | 71.1 (9.5)            | 72.0 (7.4)             | 73.0 (6.9)              | 70.2 (9.0)              |
| <b>Women, n(%)</b>                                  | 211<br>(49.5%)         | 39<br>(48.8%)         | 40<br>(50.6%)         | 38<br>(43.2%)          | 56<br>(56.0%)           | 38<br>(48.1%)           |
| <b>APOE-ε4<br/>carriershp,<br/>n(%)<sup>a</sup></b> | 246<br>(57.7%)         | 26<br>(32.5%)         | 58<br>(73.4%)         | 62<br>(70.5%)          | 74<br>(74.0%)           | 26<br>(32.9%)           |
| <b>Years of<br/>education<sup>b</sup></b>           | 12.3 (3.8)             | 12.0 (3.2)            | 12.2 (3.4)            | 12.7 (4.5)             | 12.0 (4.0)              | 12.7 (3.5)              |
| <b>Amyloid-PET,<br/>Centiloids<sup>c</sup></b>      | 37.3<br>(44.2)         | -4.48<br>(9.50)       | 41.8<br>(36.0)        | 69.6<br>(36.0)         | 115 (23.3)              | 5.67<br>(23.3)          |
| <b>Tau-PET,<br/>SUVR<sup>d</sup></b>                | 1.53<br>(0.61)         | 1.16<br>(0.08)        | 1.23<br>(0.21)        | 1.50<br>(0.45)         | 2.38<br>(0.58)          | 1.16<br>(0.10)          |
| <b>Cortical<br/>thickness,<br/>mm<sup>e</sup></b>   | 2.46<br>(0.16)         | 2.56<br>(0.09)        | 2.55<br>(0.12)        | 2.46<br>(0.13)         | 2.32<br>(0.15)          | 2.46<br>(0.18)          |
| <b>CSF NfL<sup>f</sup></b>                          | 245 (175)              | 147 (79.1)            | 189 (153)             | 223 (128)              | 316 (180)               | 333 (222)               |
| <b>mPACC<sup>g</sup></b>                            | -1.62<br>(2.03)        | 0.06<br>(0.76)        | -0.26<br>(0.78)       | -1.88<br>(0.72)        | -4.34<br>(1.72)         | -1.69<br>(2.03)         |
| <b>Progressed<br/>to MCI</b>                        | 11<br>(2.6%)           | 0<br>(0%)             | 11<br>(13.9%)         | -                      | -                       | -                       |
| <b>Progressed<br/>to ADD+</b>                       | 41<br>(9.6%)           | 0<br>(0%)             | 3<br>(3.8%)           | 38<br>(43.2%)          | -                       | -                       |

970

971 **Table 1: BioFINDER-2 participants' characteristics**

972 Data is shown as mean(SD) unless otherwise stated. Participants are divided by  
 973 clinical diagnosis and amyloid status based on their CSF Aβ<sub>42/40</sub> levels (Aβ<sub>+</sub>: <0.080).  
 974 Only participants who progressed to MCI or dementia patients due to AD etiology were  
 975 considered to progress.

976 <sup>a</sup>, 1 participant missing; <sup>b</sup>, 4 participants missing; <sup>c</sup>, 175 participants missing; <sup>d</sup>, 9  
 977 participants missing; <sup>e</sup>, 6 participants missing; <sup>f</sup>, 4 participants missing; <sup>g</sup>, 36  
 978 participants missing.

979 Abbreviations: Aβ, amyloid-β; AD, Alzheimer's disease; ADD+, Alzheimer's disease  
 980 dementia amyloid positive; CU-, cognitively unimpaired amyloid negative; CU+,  
 981 cognitively unimpaired amyloid positive; CSF, cerebrospinal fluid; MCI, mild cognitive  
 982 impairment amyloid positive; nonAD, non-Alzheimer's related disease; PET, positron  
 983 emission tomography; ROI, region of interest; SD, standard deviation; SUVR,  
 984 standardized uptake value ratio.

985

|                                                            | All<br>(n=222) | CU-<br>(n=84)   | CU+<br>(n=98)  | Very mild<br>AD (n=24) | AD<br>dementia<br>(n=9) | Other<br>dementias<br>(n=7) |
|------------------------------------------------------------|----------------|-----------------|----------------|------------------------|-------------------------|-----------------------------|
| Age, years                                                 | 71.2 (7.7)     | 67.6 (7.2)      | 73.2 (7.4)     | 73.4 (6.4)             | 74.1 (7.6)              | 75.0 (7.2)                  |
| Women, n(%)                                                | 112<br>(50.5%) | 39<br>(46.4%)   | 56<br>(57.1%)  | 9<br>(37.5%)           | 4<br>(44.4%)            | 4<br>(57.1%)                |
| APOE-ε4<br>carriership,<br>n(%) <sup>a</sup>               | 99 (44.6%)     | 18 (21.4%)      | 56 (57.1%)     | 15 (62.5%)             | 6 (66.7%)               | 4 (57.1%)                   |
| Years of<br>education                                      | 16.3 (2.5)     | 16.5 (2.3)      | 16.5 (2.4)     | 14.9 (2.8)             | 14.7 (2.6)              | 17.7 (2.2)                  |
| Amyloid-PET,<br>Centiloids                                 | 44.0 (41.2)    | 7.6 (11.2)      | 57.7 (33.3)    | 83.6 (23.7)            | 119 (38.3)              | 57.9 (46.8)                 |
| Tau-PET,<br>SUVR <sup>b</sup>                              | 1.24 (0.22)    | 1.13 (0.08)     | 1.22 (0.13)    | 1.51 (0.38)            | 1.72 (0.25)             | 1.23 (0.12)                 |
| Cortical<br>thickness,<br>mm                               | 2.52 (0.16)    | 2.59 (0.12)     | 2.53 (0.14)    | 2.39 (0.17)            | 2.29 (0.15)             | 2.35 (0.19)                 |
| CSF NfL <sup>c</sup>                                       | 1000 (578)     | 740 (313)       | 1010 (489)     | 1660 (974)             | 1360 (404)              | 1230 (569)                  |
| Global<br>cognitive<br>composite, z-<br>score <sup>d</sup> | 0.44<br>(1.11) | -0.01<br>(0.72) | 0.36<br>(0.75) | 2.01<br>(0.96)         | 3.86<br>(2.36)          | 1.12<br>(1.40)              |
| Progressed<br>to CDR≥0.5 <sup>e</sup>                      | 41 (18.5%)     | 8 (9.5%)        | 33 (33.7%)     | -                      | -                       | -                           |
| Progressed<br>to CDR≥1 <sup>f</sup>                        | 30 (14.5%)     | 0 (0%)          | 14 (14.3%)     | 16 (66.7%)             | -                       | -                           |

986

987 **Table 2: Knight-ADRC participants' characteristics**

988 Data is shown as mean(SD) unless otherwise stated. Participants are divided by  
989 clinical diagnosis and amyloid status based on their CSF Aβ<sub>42/40</sub> levels (Aβ+:  
990 <0.0673). Very mild AD dementia patients had a CDR=0.5 and mild AD dementia  
991 patients had a CDR≥1, both with AD as etiology. Other dementias group includes  
992 participants with CDR>0 with non-AD etiology. Only participants who progressed to  
993 CDR≥0.5 or CDR≥1 due to AD etiology were considered to progress.

994 <sup>a</sup>, 1 participant missing; <sup>b</sup>, 3 participants missing; <sup>c</sup>, 5 participants missing; <sup>d</sup>, 2  
995 participants missing; <sup>e</sup>, 4 participants missing; <sup>f</sup>, 8 participants missing.

996 Abbreviations: Aβ, amyloid-β; AD, Alzheimer's disease; ADD+, Alzheimer's disease  
997 dementia amyloid positive; CU-, cognitively unimpaired amyloid negative; CU+,  
998 cognitively unimpaired amyloid positive; CSF, cerebrospinal fluid; MCI, mild cognitive  
999 impairment amyloid positive; mPACC, modified preclinical Alzheimer's cognitive  
1000 composite; nonAD, non-Alzheimer's related disease; PET, positron emission  
1001 tomography; ROI, region of interest; SD, standard deviation.

1002

1003 **Figure captions**

1004 **Fig 1: CSF staging model**

1005 Description of the CSF staging model and the levels of the biomarkers included in the  
1006 model by CSF stage. Cross-validated confusion matrix of the CSF biomarkers of the  
1007 model is shown in A. Biomarkers are sorted by the time they become abnormal based  
1008 on the results of SuStaln. Darkness represents the probability of that biomarker of  
1009 becoming abnormal at that position, with black being 100%. Only amyloid-positive  
1010 participants are included in this analysis. Individual biomarker levels by CSF stage in all  
1011 BioFINDER-2 participants are shown in B. CSF levels are z-scored based on a group  
1012 of CU- participants (n=63) and all increases represent increase in abnormality.  
1013 Significant differences in contiguous CSF stages are shown with asterisks. Horizontal  
1014 line is drawn at z-score=1.96 which represents 95%CI of the reference group (CU-).  
1015 Smoothed LOESS lines of all CSF biomarkers are shown in C for comparison. CSF  
1016 stage 0 represent being classified as normal by the model. Black dots and vertical lines  
1017 represent mean and SD by CSF stage, respectively. \*: p<0.05; \*\*: p<0.01; \*\*\*: p<0.001.  
1018 Abbreviations: A $\beta$ , amyloid- $\beta$ ; CI, confidence interval; CU-, cognitively unimpaired  
1019 amyloid negative; CSF, cerebrospinal fluid; LOESS, locally estimated scatterplot  
1020 smoothing; MTBR, microtubule binding region; pT, phosphorylated tau; SuStaln,  
1021 subtype and stage inference.

1022

1023 **Fig 2: AD pathology, biomarkers and cognition by CSF stages**

1024 Depiction of individual biomarker levels, not used in the creation of the model, by CSF  
1025 stage in BioFINDER-2 participants (A). These include biomarkers of amyloid (amyloid-  
1026 PET) and tau (tau-PET in the meta-temporal ROI) pathologies, neurodegeneration  
1027 (cortical thickness in the AD signature areas and CSF NfL) and cognition (mPACC).  
1028 Biomarkers are z-scored based on a group of CU- participants (n=63) and all increases  
1029 represent increase in abnormality. Significant differences in contiguous CSF stages are  
1030 shown with asterisks. Horizontal line is drawn at z-score=1.96 which represents 95%CI  
1031 of the reference group (CU-). Smoothed LOESS lines of all AD biomarkers are shown  
1032 in B for comparison. All participants with available data were included in amyloid- and  
1033 tau-PET analyses. For neurodegeneration (cortical thickness and NfL) and cognitive  
1034 (mPACC) measures, we excluded non-AD dementia patients to avoid bias. Of note,  
1035 only few AD dementia cases had amyloid-PET available due to study design. CSF  
1036 stage 0 represent being classified as normal by the model. Black dots and vertical lines  
1037 represent mean and SD per CSF stage, respectively. \*: p<0.05; \*\*: p<0.01; \*\*\*:  
1038 p<0.001.

1039 Abbreviations: A $\beta$ , amyloid- $\beta$ ; AD, Alzheimer's disease; CI, confidence interval; CU-,  
1040 cognitively unimpaired amyloid negative; CSF, cerebrospinal fluid; LOESS, locally  
1041 estimated scatterplot smoothing; mPACC, modified preclinical Alzheimer's cognitive  
1042 composite; NfL, neurofilament light; PET, positron emission tomography; ROI, region of  
1043 interest.

1044

### 1045 **Fig 3: CSF stages for predicting A/T status and cognitive stages**

1046 CSF stages for predicting pathological status as measured with PET is shown in A-B,  
1047 and for predicting cognitive stages and diagnostic groups in C-D. Barplots represent  
1048 the number of participants in each category per CSF stage. Numbers of participants in  
1049 each category per CSF stage are shown within the barplots (A and C). In B and D,  
1050 ROC curves were used to assess the classification into dichotomic categories (A $\beta$ -  
1051 PET, tau-PET and AD vs non-AD cognitive impairment), whereas ordinal logistic  
1052 regressions were used for ordinal categories (A/T status and diagnosis). Heatmaps  
1053 represent the predicted percentage of participants in each outcome category (A/T or  
1054 diagnosis) by CSF stage. The most probable (highest percentage) category by CSF  
1055 stage is framed in black. For ROC analyses, AUCs, sensitivity and specificity measures  
1056 from these analyses are shown in the plot. The optimal cut-off in each case is shown  
1057 as a vertical dashed line in A or C. An A-T+ participant (n=1) was excluded from the  
1058 A/T status analysis. Non-AD dementia cases were excluded from the cognitive stages  
1059 analysis. And, only patients with objective impairment (MCI or dementia) were included  
1060 in the analyses of AD vs. non-AD. A $\beta$ - and tau-PET were assessed as positive based  
1061 on previously validated cut-offs (A $\beta$ : SUVR>1.03, tau: SUVR>1.36).

1062 Abbreviations: A $\beta$ , amyloid- $\beta$ ; AD, Alzheimer's disease; ADD+, Alzheimer's disease  
1063 dementia amyloid-positive; A-T-, amyloid-negative tau-negative; A-T+, amyloid-  
1064 negative tau-positive; A+T-, amyloid-positive tau-negative; A+T+, amyloid-positive tau-  
1065 positive; CSF, cerebrospinal fluid; CU-, cognitively unimpaired amyloid-negative; CU+,  
1066 cognitively unimpaired amyloid-positive; MCI+, mild cognitive impairment amyloid-  
1067 positive; PET, positron emission tomography; ROC, receiver operating characteristic;  
1068 ROI, region of interest; SUVR, standardized uptake value ratio.

1069

### 1070 **Fig 4: Longitudinal rate of change of AD biomarkers by CSF stages**

1071 Depiction of individual biomarker longitudinal rates of change by CSF stage in  
1072 BioFINDER-2 participants (A). These include biomarkers of amyloid (amyloid-PET) and  
1073 tau (tau-PET in the meta-temporal ROI) pathologies, neurodegeneration (cortical  
1074 thickness in the AD signature) and cognition (mPACC). Biomarkers are z-scored based

1075 on a group of CU- participants (n=63) and all increases represent increase in  
1076 abnormality. Rates of change were calculated with individual linear regression models.  
1077 Significant differences in contiguous CSF stages are shown with asterisks. Smoothed  
1078 LOESS lines of all AD biomarkers are shown in B for comparison. All participants were  
1079 included in amyloid- and tau-PET analyses. For neurodegeneration (cortical thickness)  
1080 and cognitive (MMSE) measures, we excluded non-AD dementia patients to avoid bias.  
1081 CSF stage 0 represent being classified as normal by the model. Black dots and vertical  
1082 lines represent mean and SD per CSF stage, respectively. \*: p<0.05; \*\*: p<0.01; \*\*\*:  
1083 p<0.001.

1084 Abbreviations: A $\beta$ , amyloid- $\beta$ ; AD, Alzheimer's disease; CI, confidence interval; CU-,  
1085 cognitively unimpaired amyloid negative; CSF, cerebrospinal fluid; LOESS, locally  
1086 estimated scatterplot smoothing; mPAC, modified preclinical Alzheimer's cognitive  
1087 composite; PET, positron emission tomography; ROI, region of interest.

1088

#### 1089 **Fig 5: CSF stages for predicting clinical progression**

1090 Higher CSF stages groups (4-5) show higher HR of clinical progression compared to  
1091 lower positive stages (reference: 1-3). Progression from CU or MCI at baseline to AD  
1092 dementia is shown in A-B. Progression from MCI at baseline to AD dementia is shown  
1093 in C-D. Progression from CU at baseline to MCI is shown in E-F. Kaplan-Meier curves,  
1094 as well as the number of participants per group and timepoint are shown in A, C and E,  
1095 respectively. Cox-proportional hazards models were used to calculate HR[95%CI] of  
1096 higher CSF stages (4-5) compared to the reference (1-3, B, D and F). These analyses  
1097 were adjusted for age, sex in all cases, and additionally for clinical status at baseline  
1098 (CU or MCI) if appropriate.

1099 Abbreviations: AD, Alzheimer's disease; CI, confidence interval; CSF, cerebrospinal  
1100 fluid; HR, hazard ratios; MCI, mild cognitive impairment.

1101

#### 1102 **Fig 6: Replication of main analyses in Knight-ADRC participants**

1103 Description of the model is shown in A-B. Cross-validated confusion matrix of the CSF  
1104 biomarkers of the model is shown in A. Biomarkers are sorted by the time they become  
1105 abnormal based on the results of SuStaln. Darkness represents the probability of that  
1106 biomarker of becoming abnormal at that position, with black being 100%. Only amyloid-  
1107 positive participants are included in this analysis. Description of the CSF levels of the  
1108 biomarkers included in the model by CSF stage are shown in B for all Knight-ADRC  
1109 participants. Depiction of individual biomarker levels, not used in the creation of the  
1110 model, by CSF stage are shown in C. These include biomarkers of amyloid (amyloid-  
1111 PET) and tau (tau-PET in the meta-temporal ROI) pathologies, neurodegeneration



1112 (cortical thickness in the AD signature areas and CSF NfL) and cognition (global  
1113 cognitive composite). CSF and AD biomarker levels are z-scored based on a group of  
1114 CU- participants (n=71) and all increases represent increase in abnormality. Horizontal  
1115 line is drawn at z-score=1.96 which represents 95%CI of the reference group (CU-).  
1116 CSF stage 0 represent being classified as normal by the model. Prediction of amyloid-  
1117 PET (D-G), tau-PET (E-H) and A/T status (by PET, F-I) are shown next. Number of  
1118 participants in each category are colored in D, E and F. Numbers of participants in  
1119 each category per CSF stage are shown within the barplots. In G and H, ROC curves  
1120 were used to determine the CSF stage to optimally classify participants into  
1121 positive/negative in each case. AUCs, sensitivity and specificity measures from these  
1122 analyses are shown in the plot. The optimal cut-off in each case is shown as a vertical  
1123 dashed line in D and E, respectively. Ordinal logistic regression was used for assessing  
1124 A/T status (I). The heatmap represent the predicted percentage of participants in each  
1125 A/T group per CSF stage. The most probable (highest percentage) group per CSF  
1126 stage is framed in black. Amyloid-PET was considered positive if Centiloids>20, tau-  
1127 PET was considered positive if SUVR at meta-temporal ROI was higher than 1.32. An  
1128 A-T+ participant (n=1) was excluded from the A/T status analysis. Higher CSF stages  
1129 groups (4-5) show higher HR of clinical progression compared to lower stages  
1130 (reference: 1-3, J-M). Progression from CDR=0 or CDR=0.5 at baseline to CDR≥1 is  
1131 shown in J-K. Progression from CDR=0 at baseline to CDR≥0.5 is shown in L-M.  
1132 Kaplan-Meier curves, as well as the number of participants per group and timepoint are  
1133 shown in J and L. Cox-proportional hazards models were used to calculate HR[95%CI]  
1134 of higher CSF stages (4-5) compared to the reference (1-3, K and M). These analyses  
1135 were adjusted for age, sex in all cases, and additionally for clinical status at baseline  
1136 (CDR=0 or CDR=1) if appropriate.

1137 Abbreviations: A $\beta$ , amyloid- $\beta$ ; AD, Alzheimer's disease; AUC, area under the curve;  
1138 CDR, clinical dementia rating; CI, confidence interval; CU-, cognitively unimpaired  
1139 amyloid negative; CSF, cerebrospinal fluid; HR, hazard ratio; LOESS, locally estimated  
1140 scatterplot smoothing; MMSE, Mini-mental state examination; MTBR, microtubule  
1141 binding region; NfL, neurofilament light; PET, positron emission tomography; ROC,  
1142 receiver operating characteristic; SuStaln, subtype and stage inference; SUVR,  
1143 standardized uptake value ratio.

1144

## 1145 **Extended data**

### 1146 **Ext Data Fig 1: Creation and optimization of the model**

1147 Initial model with all CSF biomarkers (A $\beta$ 42/40, pT217/T217, pT231/T231, pT181/T181,  
1148 pT205/T205, MTBR-tau243 and total-tau) is shown in A. First two columns represent

1149 the statistics, CVIC and log-likelihood, of this model for one, two and three subtypes.  
1150 Each dot in log-likelihood plot represents one of the ten cross-validation sets of data.  
1151 Lower CVIC and higher log-likelihood values represent better performance of the  
1152 model. Although higher number of subtypes had higher CVIC, the comparable log-  
1153 likelihood across subtypes suggests that one subtype is complex enough to explain the  
1154 variability observed in the data. Cross-validated confusion matrix of the one subtype  
1155 model is shown in the last column. Here, biomarkers are sorted by the time they  
1156 become abnormal based on the results of SuStaln. Darkness represents the probability  
1157 of that biomarker of becoming abnormal at that position, with black being 100%. Given  
1158 that some biomarkers (pT217/T217, pT231/T231 and pT181/T181) show high overlap  
1159 on the ordering, we optimized the model by removing these biomarkers systematically  
1160 (B). All models without one or two of these biomarkers were tested (models 2 to 7).  
1161 CVIC (left) and cross-validated confusion matrixes (right) for each of these models are  
1162 shown in B, respectively. CVIC shows that the optimal model was that excluding both  
1163 pT231/T231 and pT181/T181 (model 7, shown in C). Both CVIC and log-likelihood  
1164 measures show that one subtype was the optimal model when using this set of  
1165 biomarkers.

1166 Abbreviations: A $\beta$ , amyloid- $\beta$ ; CVIC, cross-validation information criterion; MTBR,  
1167 microtubule binding region; pT, phosphorylated tau; SuStaln, subtype and stage  
1168 inference.

1169  
1170

### 1171 **Ext Data Fig 2: Demographic, genetic and clinical characteristics by CSF stage**

1172 Depiction of basic characteristics of BioFINDER-2 (A-E) and Knight-ADRC (F-J) by  
1173 CSF stage. Kruskal-Wallis or chi-square tests were used to investigate the association  
1174 between each of these characteristics and CSF stages. P-values of these tests are  
1175 shown at the top right of each subplot. Number of individuals in each category are  
1176 shown inside the barplots.

1177 Abbreviations: AD, Alzheimer's disease; ADD+, Alzheimer's disease dementia amyloid  
1178 positive; CU-, cognitively unimpaired amyloid negative; CU+, cognitively unimpaired  
1179 amyloid positive; CSF, cerebrospinal fluid; MCI+, mild cognitive impairment amyloid  
1180 positive; nonAD, non-Alzheimer's related disease; other Dem, non-Alzheimer's type  
1181 dementia.

1182  
1183

### 1184 **Ext Data Fig 3: Model stability**

1185 Depiction of the evolution of CSF stages in BioFINDER-2 (n=220, A-B) and Knight-  
1186 ADRC participants (n=51, C-D) with longitudinal CSF available. As longitudinal CSF  
1187 A $\beta$ 42/40 levels were not available for any BioFINDER-2 participant, we imputed this  
1188 data with their baseline levels. We show the number of progressors, regressors and  
1189 stable participants in A and C, for each cohort respectively. In B and D, we further  
1190 show the CSF stages at follow-up. For those Knight-ADRC with more than one  
1191 longitudinal visit we took the one more distant from the baseline.

1192 Abbreviations: A $\beta$ , amyloid- $\beta$ ; CSF, cerebrospinal fluid.

1193

1194

#### 1195 **Ext Data Fig 4: Tau-PET binding in different Braak regions by CSF stages**

1196 Depiction of tau-PET binding in different areas of tau deposition, by CSF stage in all  
1197 BioFINDER-2 (A) and Knight-ADRC participants (B). These areas include regions of  
1198 early (Braak I-II), intermediate (Braak II-IV) and late (Braak V-VI) tau deposition. Tau-  
1199 PET levels are z-scored based on a group of CU- participants (BioFINDER-2: n=63  
1200 and Knight-ADRC: n=71) and all increases represent increase in abnormality.  
1201 Significant differences in contiguous CSF stages are shown with asterisks. Horizontal  
1202 line is drawn at z-score=1.96 which represents 95%CI of the reference group (CU-).  
1203 Smoothed LOESS lines of all AD biomarkers are shown in B for comparison. CSF  
1204 stage 0 represent being classified as normal by the model. \*: p<0.05; \*\*: p<0.01; \*\*\*:  
1205 p<0.001.

1206 Abbreviations: A $\beta$ , amyloid- $\beta$ ; AD, Alzheimer's disease; CI, confidence interval; CU-,  
1207 cognitively unimpaired amyloid negative; CSF, cerebrospinal fluid; LOESS, locally  
1208 estimated scatterplot smoothing; PET, positron emission tomography; ROI, region of  
1209 interest.

1210

1211

#### 1212 **Ext Data Fig 5: Cognitive composites by CSF stages**

1213 Depiction of different cognitive measures, by CSF stage in BioFINDER-2 (A) and  
1214 Knight-ADRC participants (B). These measures include: mPACC (ADAS-delayed,  
1215 animal fluency, MMSE and TMT-A), memory (ADAS-delayed and ADAS-immediate),  
1216 executive function (TMT-A, TMT-B and symbols digit), language (animal fluency and  
1217 BNT-15) and visuospatial (VOSP-cube and VOSP-incomplete) for BioFINDER-2. For  
1218 Knight-ADRC we had a global cognitive composite (FCSRT, animals, TMT-A and TMT-  
1219 B), an executive function composite (TMT-A and TMT-B), a memory (FCSRT) and  
1220 language (animal fluency) tests. Cognitive scores are z-scored based on a group of  
1221 CU- participants (BioFINDER-2: n=60 and Knight-ADRC: n=71) and all increases

1222 represent increase in abnormality. Significant differences in contiguous CSF stages are  
1223 shown with asterisks. Horizontal line is drawn at z-score=1.96 which represents 95%CI  
1224 of the reference group (CU-). Smoothed LOESS lines of all AD biomarkers are shown  
1225 in B for comparison. We excluded non-AD dementia patients to avoid bias in these  
1226 analyses. CSF stage 0 represents being classified as normal by the model. \*:  $p<0.05$ ;  
1227 \*\*:  $p<0.01$ ; \*\*\*:  $p<0.001$ .

1228 Abbreviations: AD, Alzheimer's disease; ADAS, Alzheimer's disease assessment  
1229 scale; BNT, Boston naming test; CI, confidence interval; CU-, cognitively unimpaired  
1230 amyloid negative; CSF, cerebrospinal fluid; FCSRT, free and cued selective reminding  
1231 test; LOESS, locally estimated scatterplot smoothing; MMSE, Mini-Mental state  
1232 examination; mPACC, modified version of preclinical Alzheimer's disease cognitive  
1233 composite; TMT, trial making test; VOSP, visual object and space perception battery.

1234

1235

#### 1236 **Ext Data Fig 6: Individual CSF stages for predicting clinical progression**

1237 Kaplan-Meier curves for all individual CSF stages in BioFINDER-2 (A-C) and Knight-  
1238 ADRC (D-E) participants. For BioFINDER-2, progression from CU or MCI at baseline to  
1239 AD dementia is shown in A; progression from MCI at baseline to AD dementia is shown  
1240 in B and; progression from CU at baseline to MCI is shown in C. For Knight-ADRC,  
1241 progression from CDR=0 or CDR=0.5 at baseline to  $CDR\geq 1$  is shown in D and;  
1242 progression from CDR=0 at baseline to  $CDR\geq 0.5$  is shown in E.

1243 Abbreviations: AD, Alzheimer's disease; CDR, clinical dementia rating; CSF,  
1244 cerebrospinal fluid; CU, cognitively unimpaired; MCI, mild cognitive impairment.

1245

1246

#### 1247 **Ext Data Fig 7: Individual biomarker levels by CSF stage in Knight-ADRC** 1248 **participants**

1249 Individual CSF biomarker levels, included in the model, by CSF stage participants are  
1250 shown in A including all Knight-ADRC participants. Depiction of individual AD-  
1251 biomarker levels, not used in the creation of the model, per CSF stage are shown in B.  
1252 All biomarker levels are z-scored based on a group of CU- participants ( $n=71$ ) and all  
1253 increases represent increase in abnormality. Significant differences in contiguous CSF  
1254 stages are shown with asterisks. Horizontal line is drawn at z-score=1.96 which  
1255 represents 95%CI of the reference group (CU-). CSF stage 0 represent being classified  
1256 as normal by the model. Black dots and vertical lines represent mean and SD per CSF  
1257 stage. \*:  $p<0.05$ ; \*\*:  $p<0.01$ ; \*\*\*:  $p<0.001$ .

1258 Abbreviations: A $\beta$ , amyloid- $\beta$ ; CI, confidence interval; CU-, cognitively unimpaired  
1259 amyloid negative; CSF, cerebrospinal fluid; MMSE, Mini-Mental state examination;  
1260 MTBR, microtubule binding region; NfL, neurofilament light; PET, positron emission  
1261 tomography; pT, phosphorylated tau; SuStaln, subtype and stage inference.

1262

1263 **Ext Data Fig 8: Excluded CSF biomarkers by CSF stage**

1264 Depiction of the CSF biomarkers excluded in the optimal model (pT231/T231 and  
1265 pT181/T181) by CSF stage in BioFINDER-2 (A-B) and Knight-ADRC (C-D)  
1266 participants. CSF pT217/T217 is also shown for comparison. CSF levels are z-scored  
1267 based on a group of CU- participants (BioFINDER-2: n=63, Knight-ADRC: n=71) and  
1268 all increases represent increase in abnormality. Significant differences in contiguous  
1269 CSF stages are shown with asterisks. Horizontal line is drawn at z-score=1.96 which  
1270 represents 95%CI of the reference group (CU-). Smoothed LOESS lines of all CSF  
1271 biomarkers are shown in B (BioFINDER-2) and D (Knight-ADRC) for comparison. CSF  
1272 stage 0 represent being classified as normal by the model. Black dots and vertical lines  
1273 represent mean and SD per CSF stage, respectively. \*: p<0.05; \*\*: p<0.01; \*\*\*:  
1274 p<0.001.

1275 Abbreviations: A $\beta$ , amyloid- $\beta$ ; CI, confidence interval; CU-, cognitively unimpaired  
1276 amyloid negative; CSF, cerebrospinal fluid; LOESS, locally estimated scatterplot  
1277 smoothing; MTBR, microtubule binding region; pT, phosphorylated tau; SuStaln,  
1278 subtype and stage inference.

1279

**A**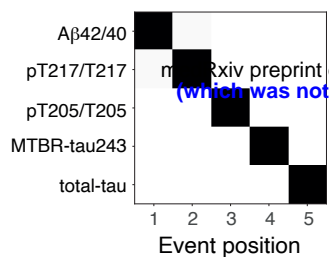**B**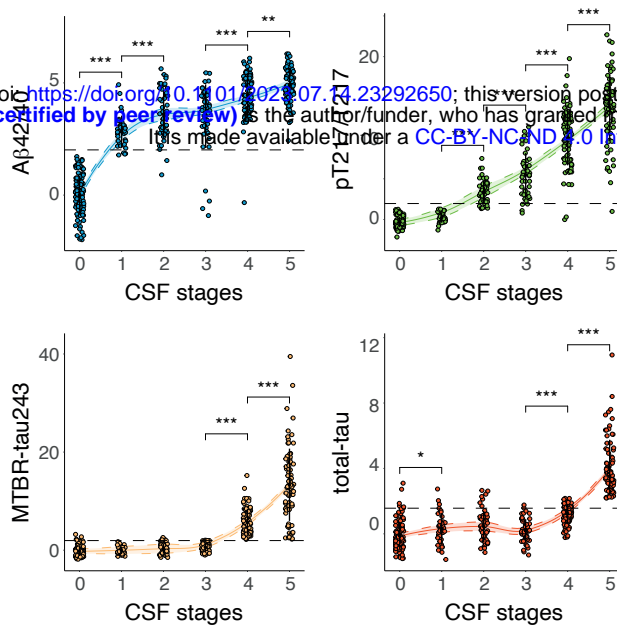**C**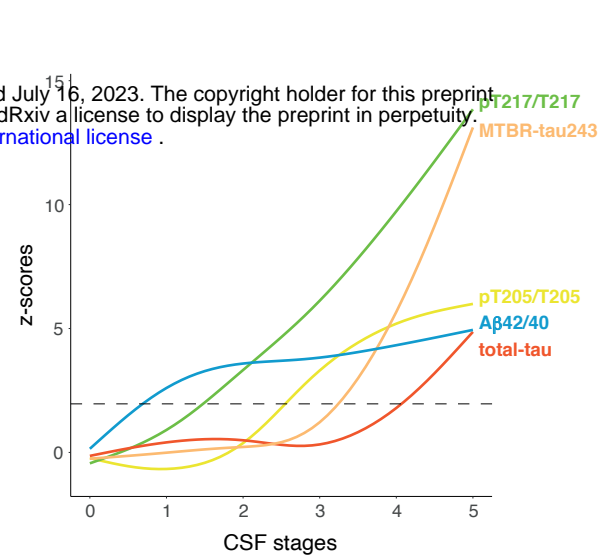

bioRxiv preprint doi: <https://doi.org/10.1101/2023.07.14.23292650>; this version posted July 16, 2023. The copyright holder for this preprint (which was not certified by peer review) is the author/funder, who has granted medRxiv a license to display the preprint in perpetuity. It is made available under a [CC-BY-NC-ND 4.0 International license](https://creativecommons.org/licenses/by-nc-nd/4.0/).

**A**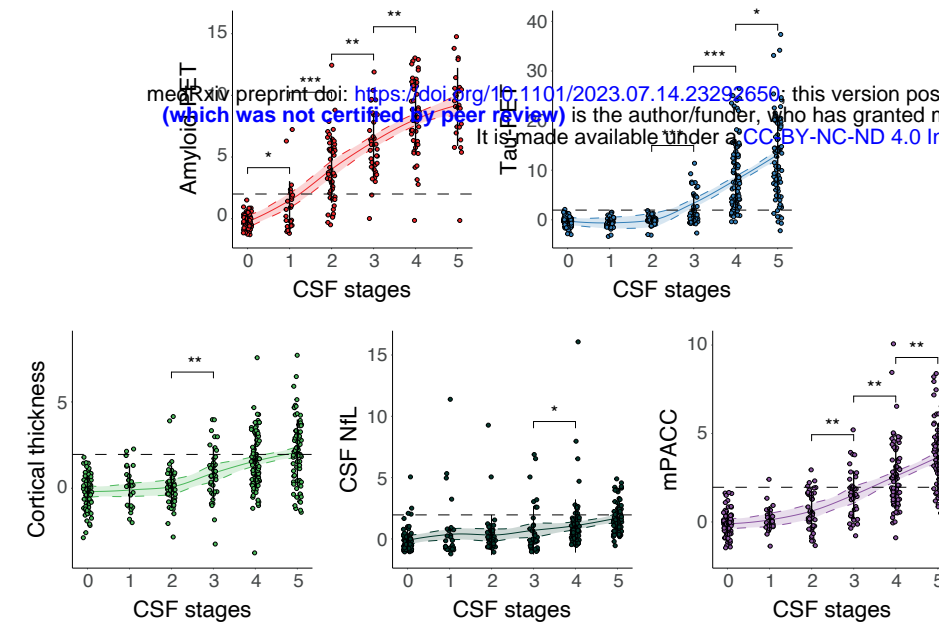**B**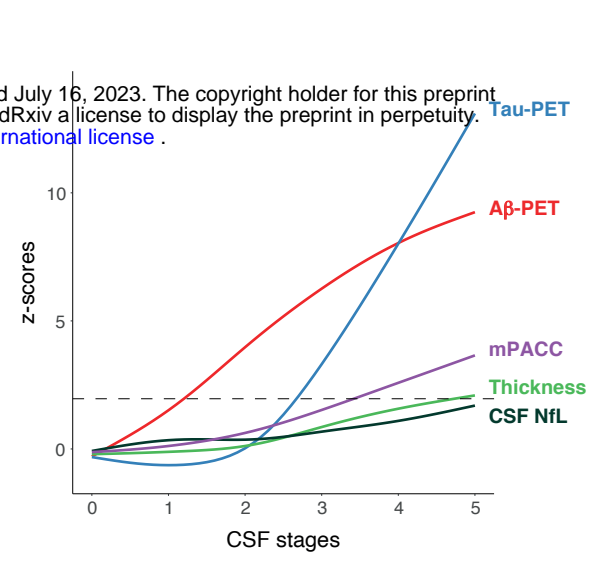

### Amyloid-PET positivity (A+)

### Tau-PET positivity (T+)

### A/T status

**A**

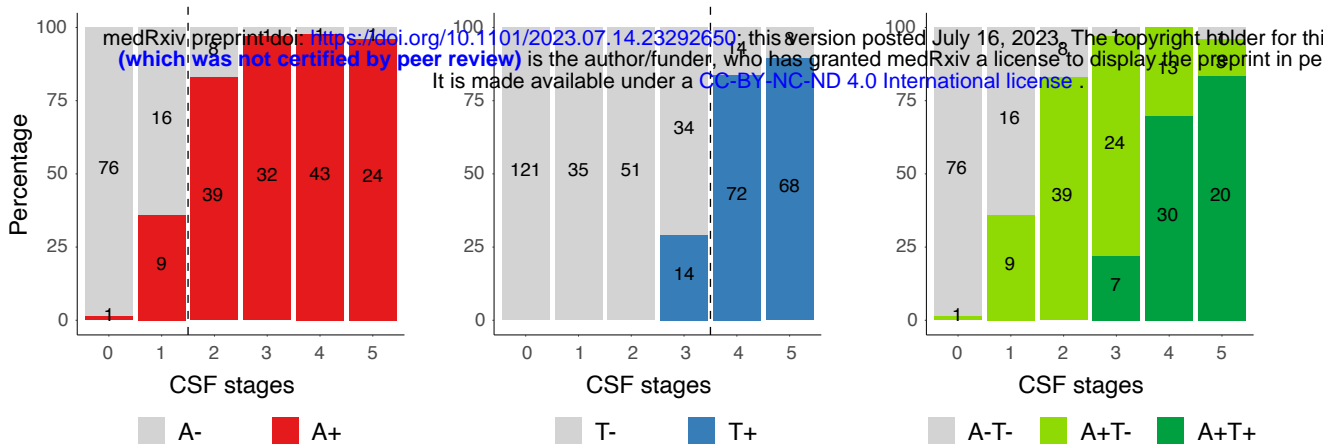

**B**

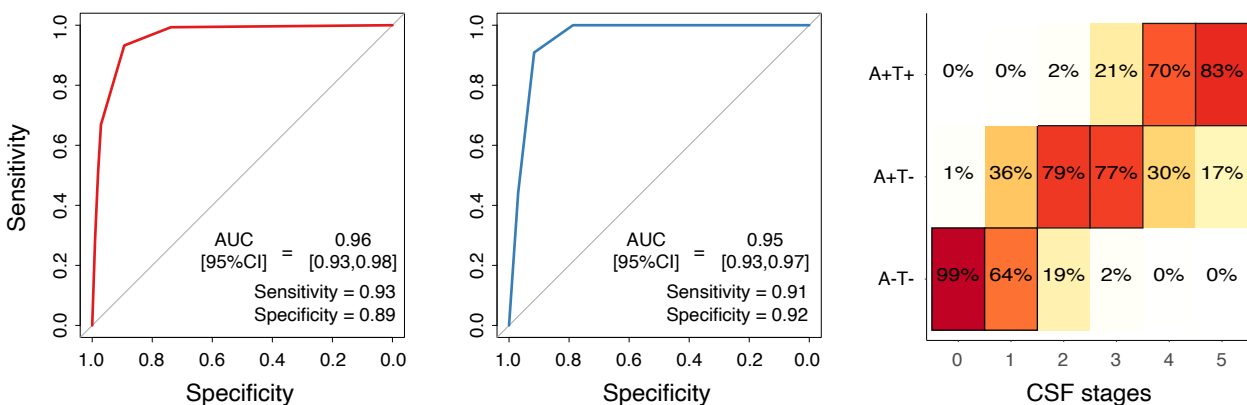

### Diagnostic (AD continuum)

### AD vs non-AD cognitive impairment

**C**

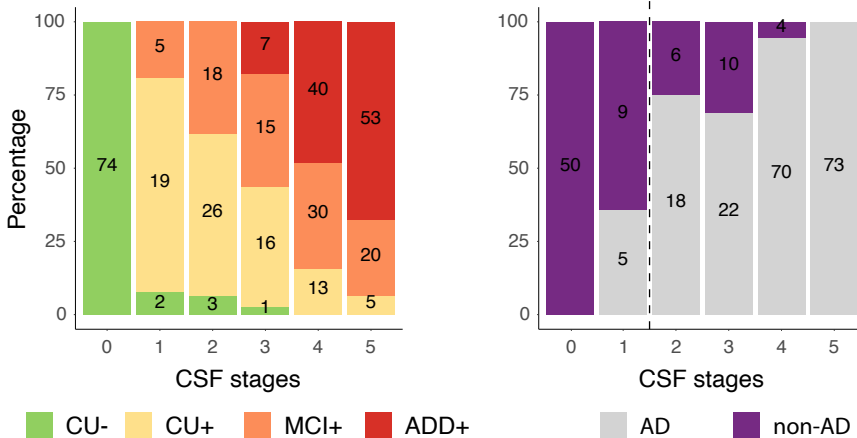

**D**

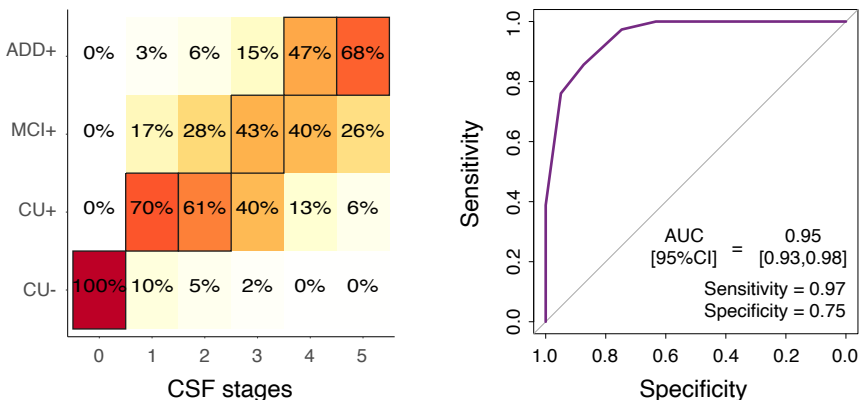



**A**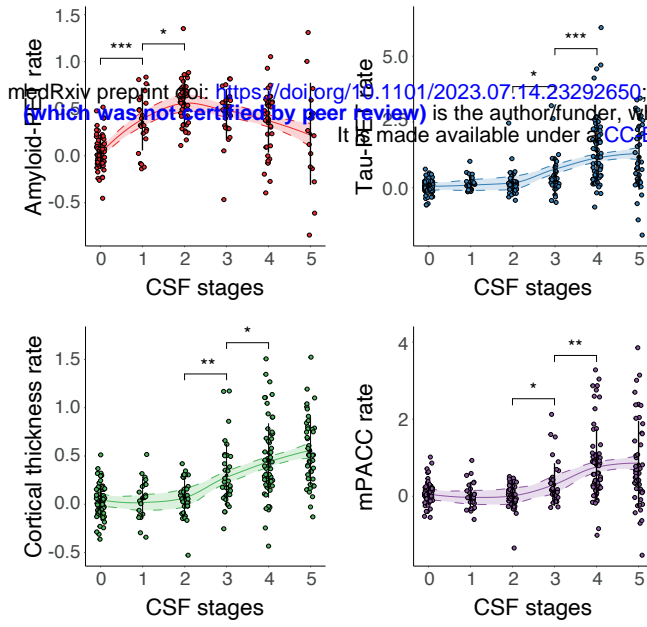**B**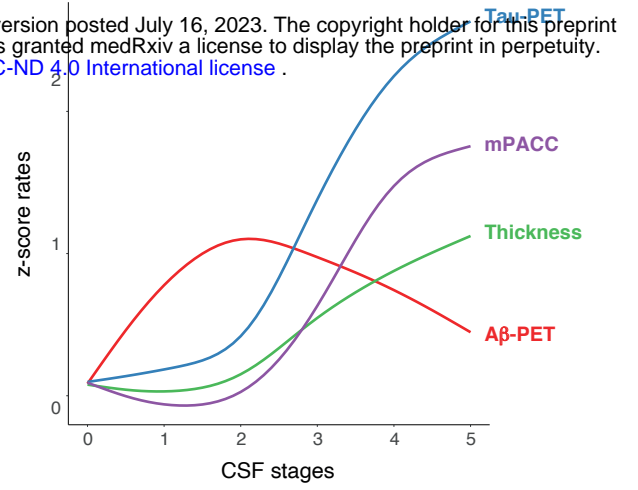

**A Progression from CU/MCI to AD dementia**

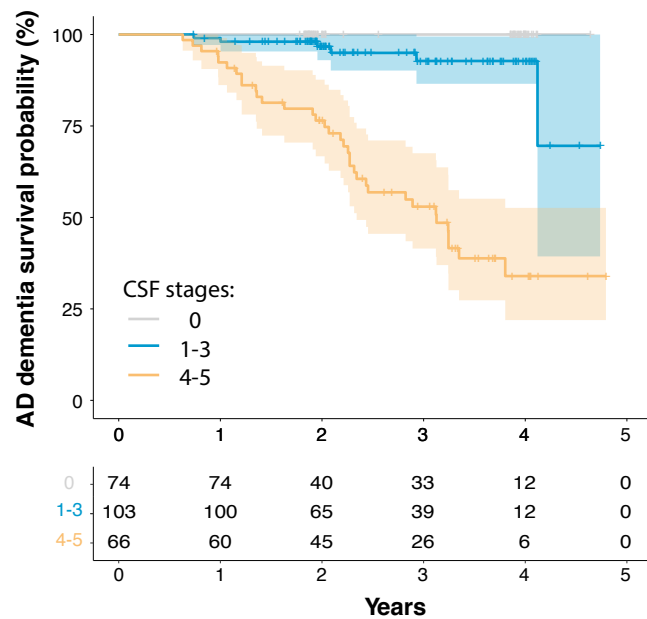

**C Progression from MCI to AD dementia**

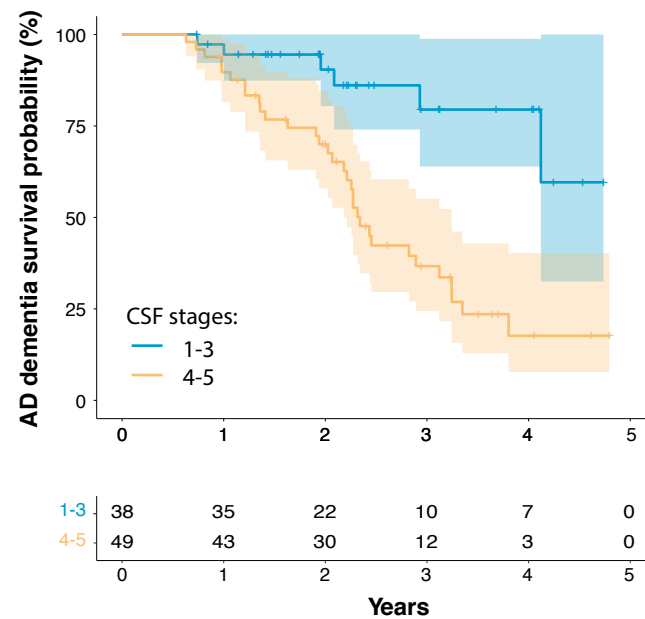

**E Progression from CU to MCI**

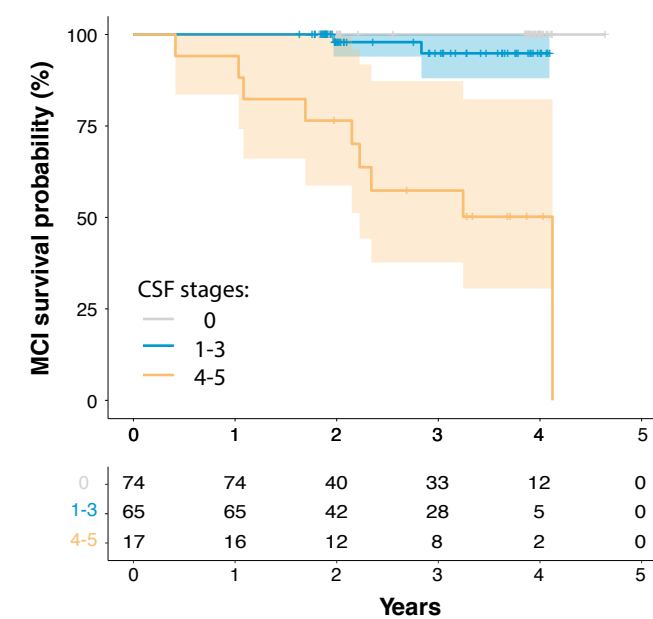

**B**

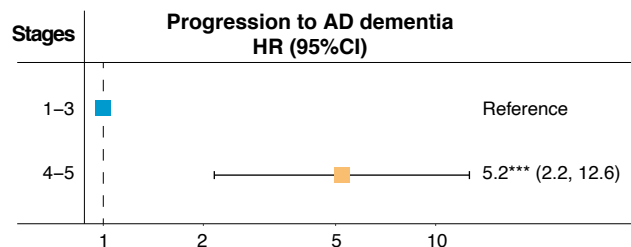

**D**

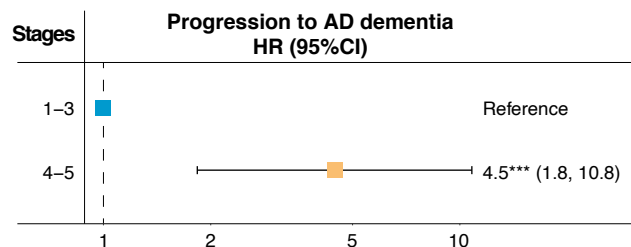

**F**

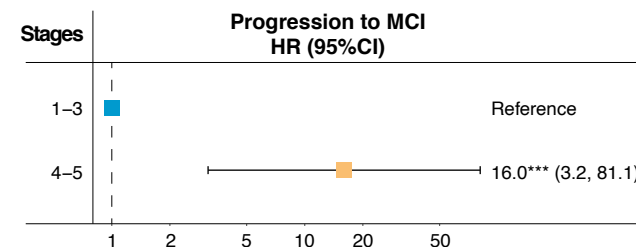

**A**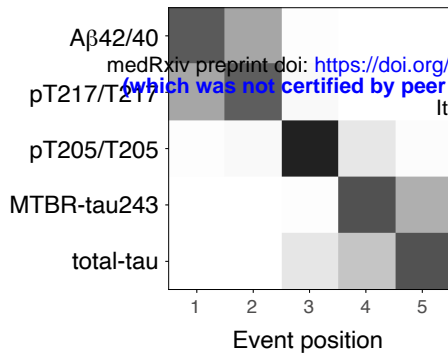**B**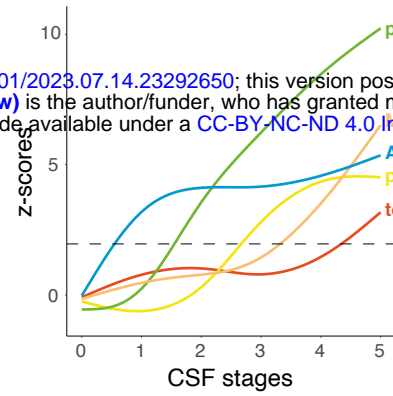**C**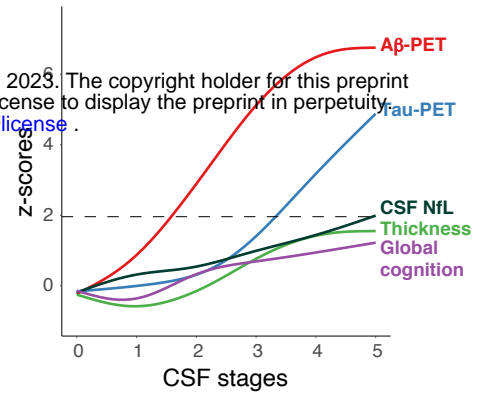**D**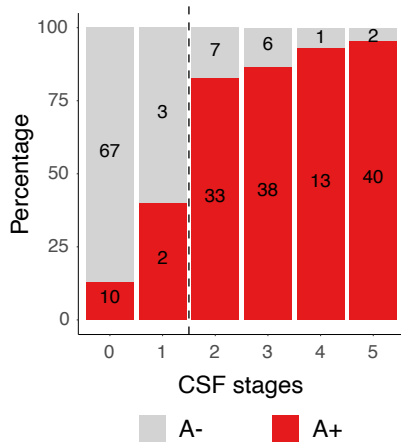**E**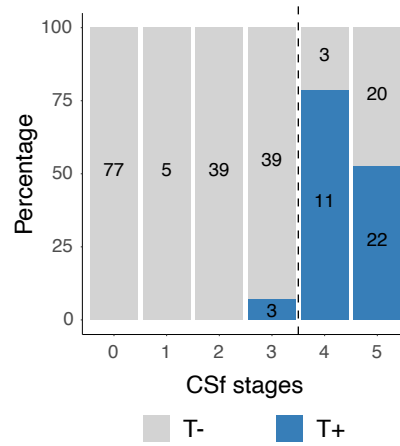**F**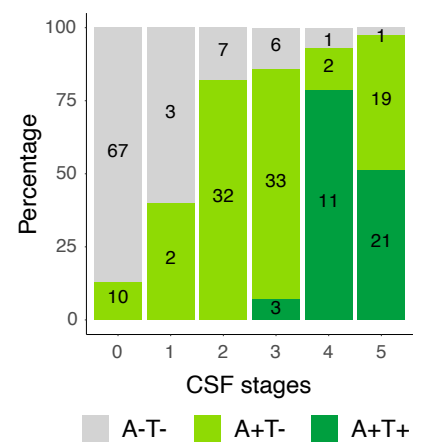**G**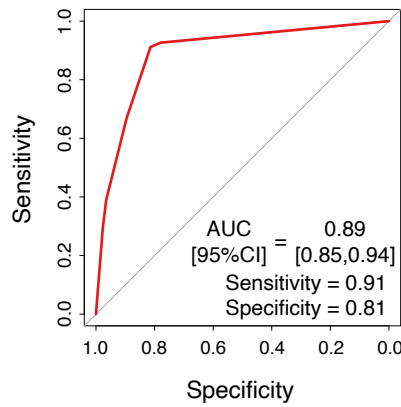**H**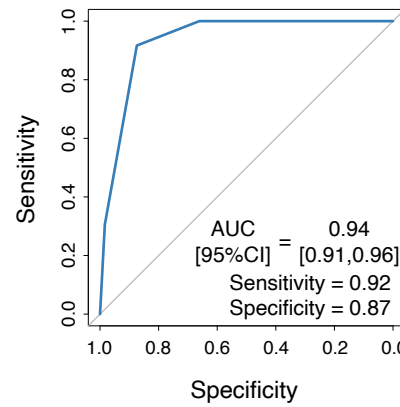**I**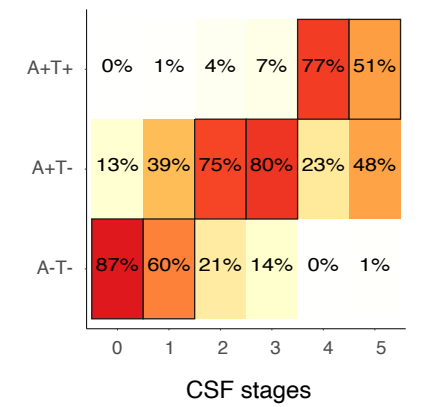**J Progression from CDR ≤ 0.5 to CDR ≥ 1**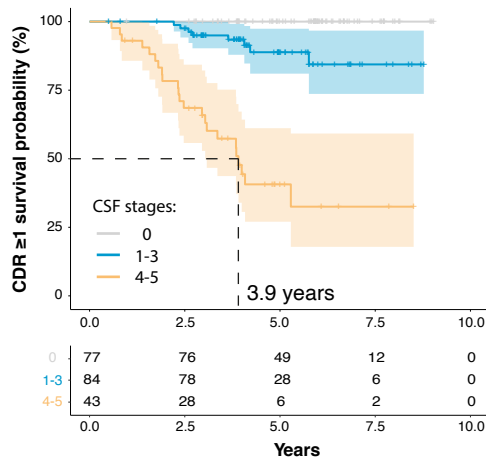**L Progression from CDR = 0 to CDR ≥ 0.5**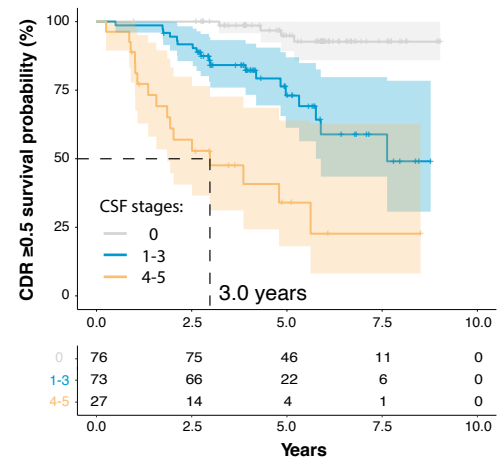**K**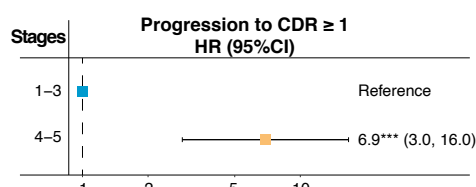**M**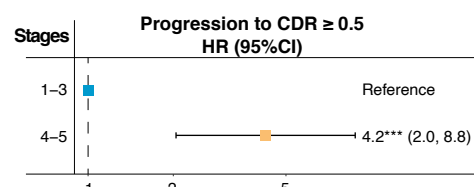

## A Initial model

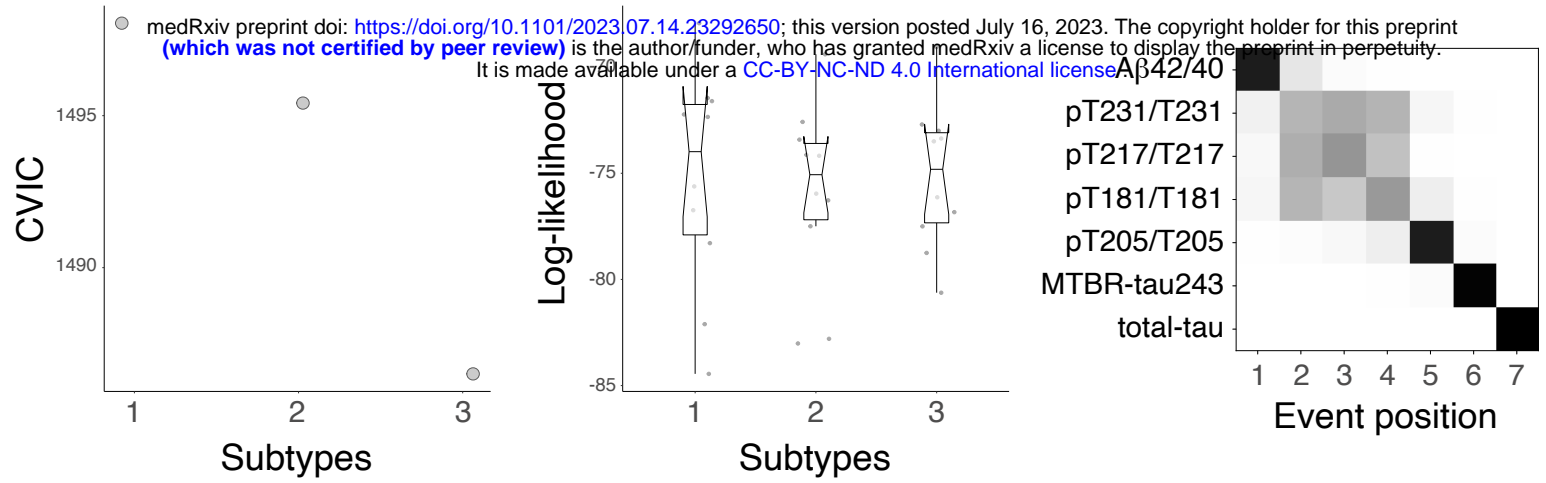

## B Optimization

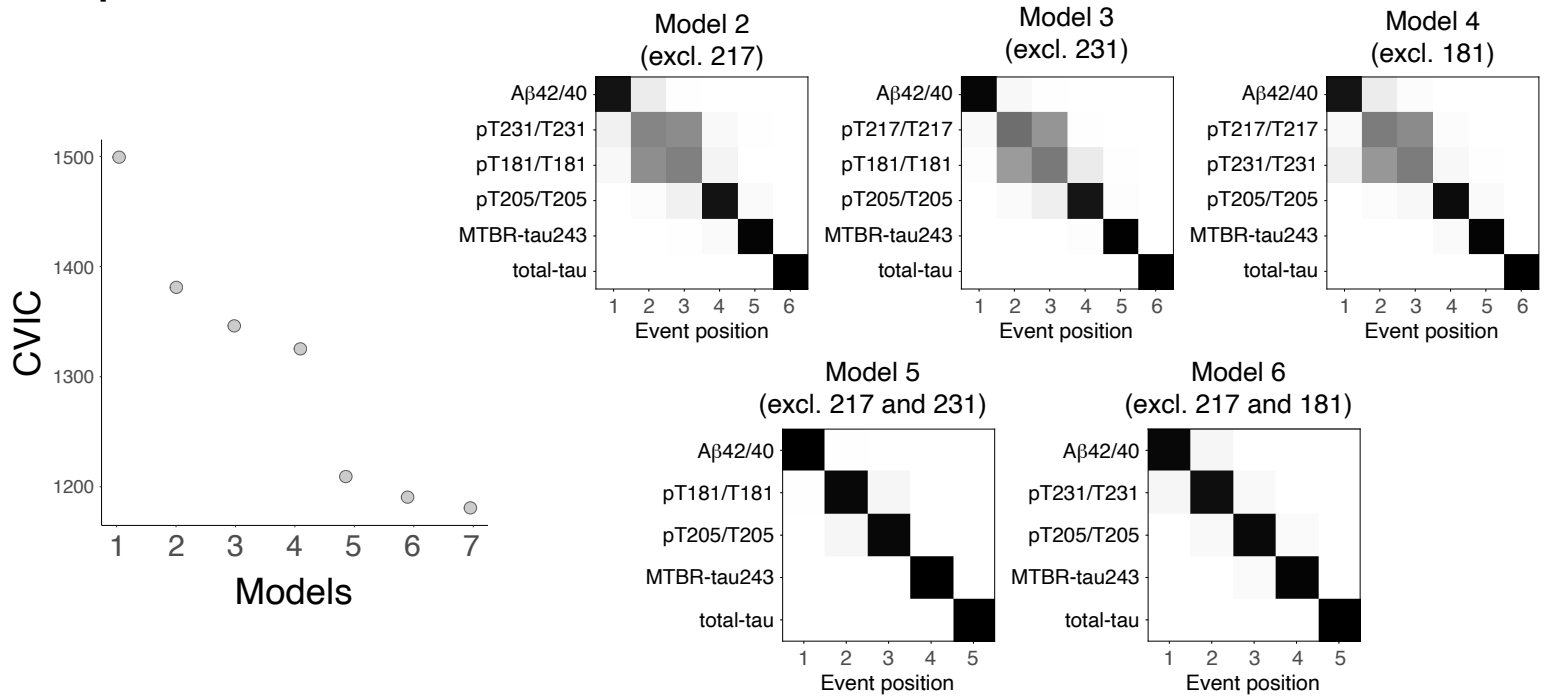

## C Final model

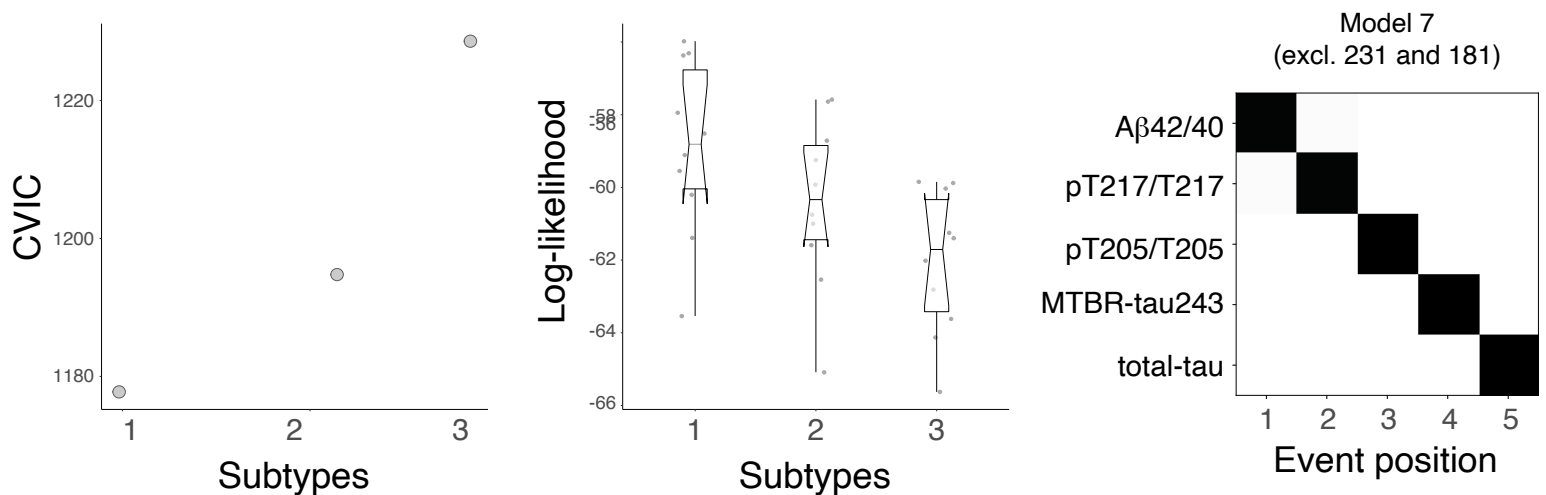

# BioFINDER-2

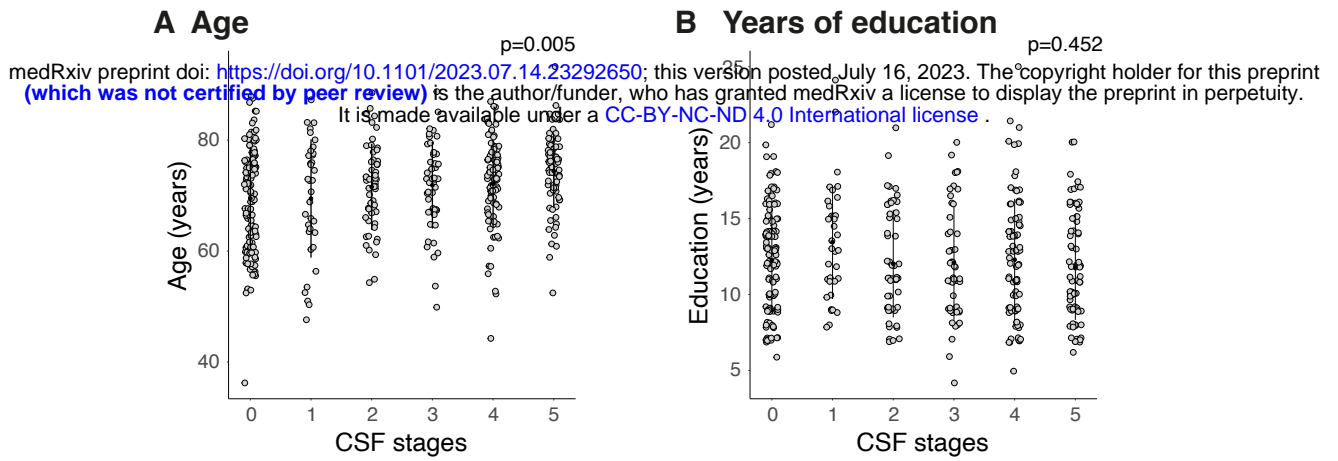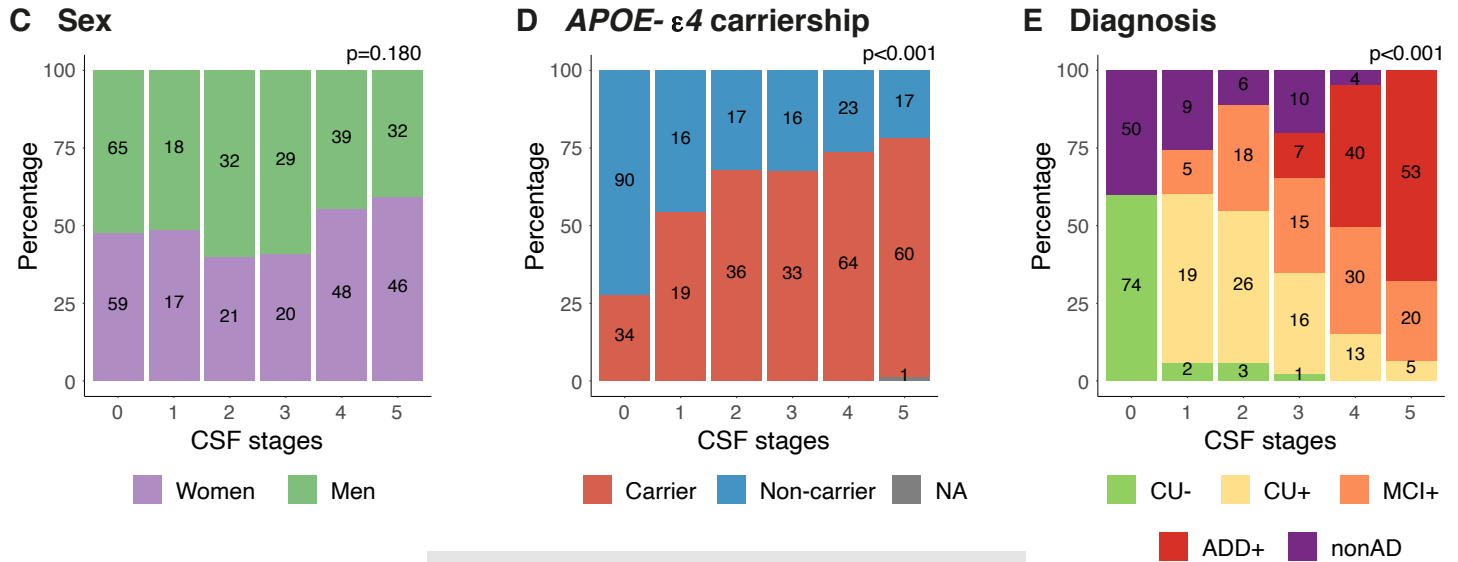

# Knight-ADRC

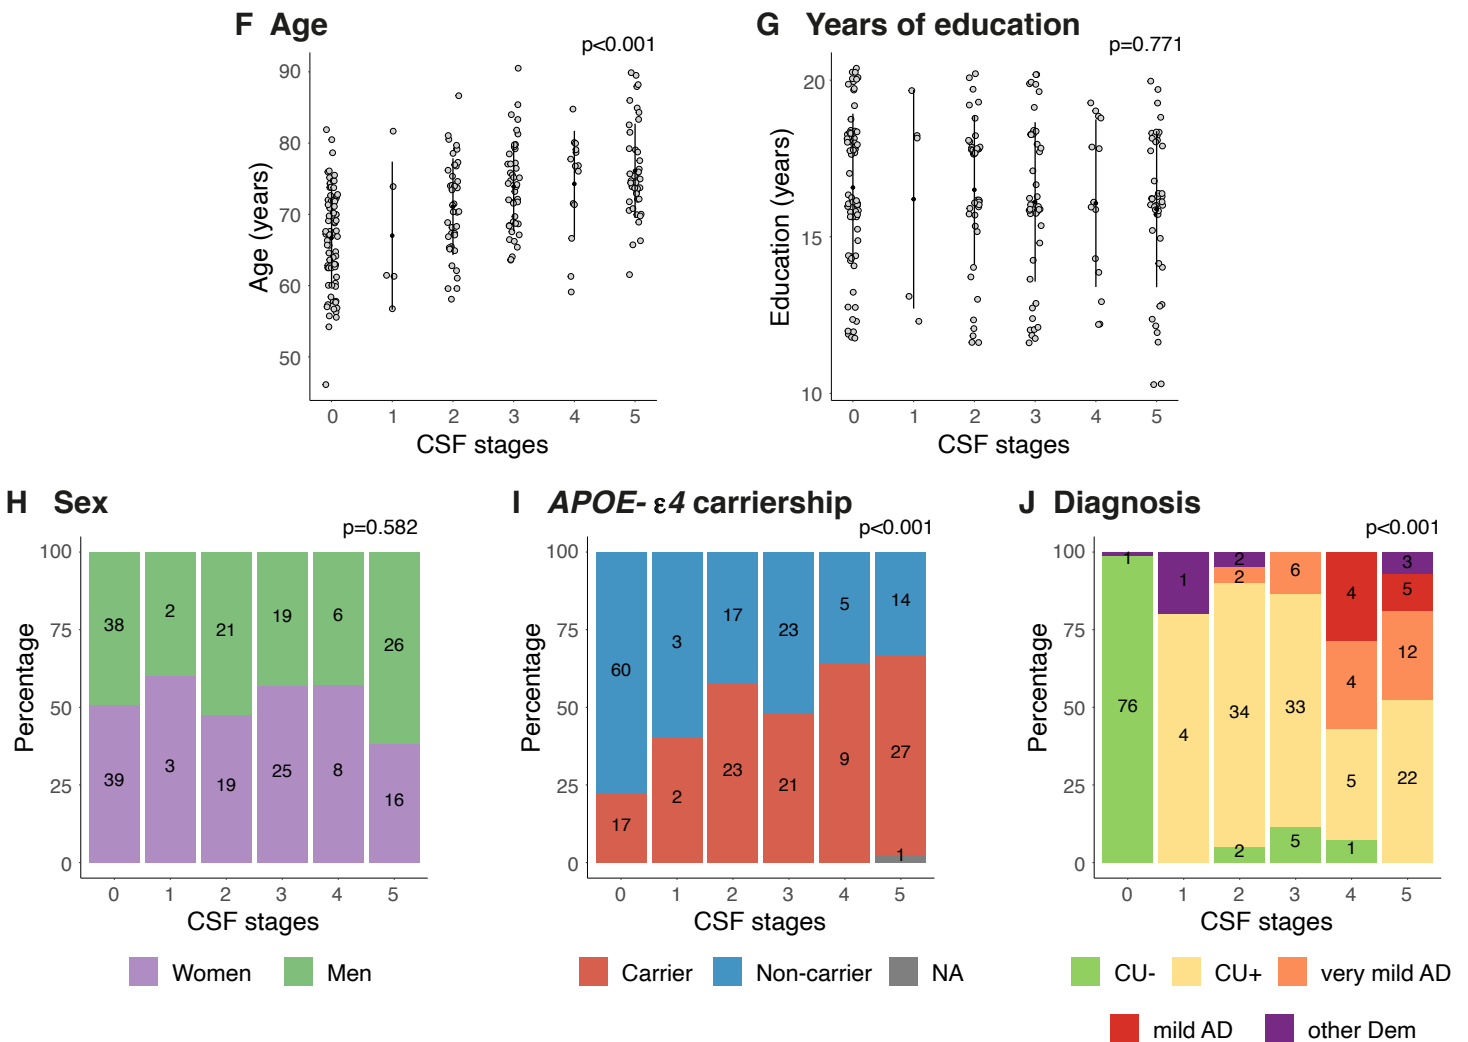

# BioFINDER-2

# Knight-ADRC

**A**

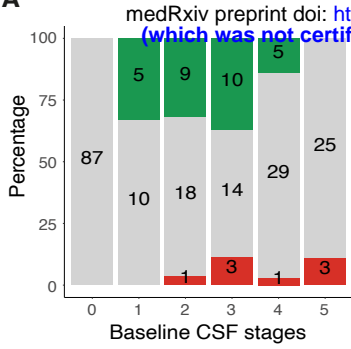

**Follow-up status:**

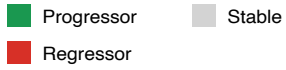

**B**

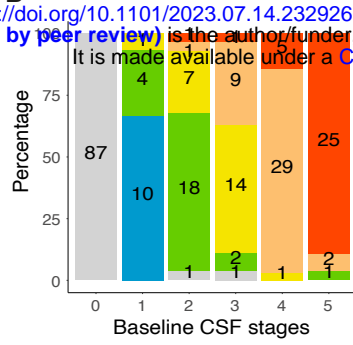

**Follow-up CSF stage:**

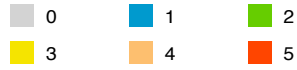

**C**

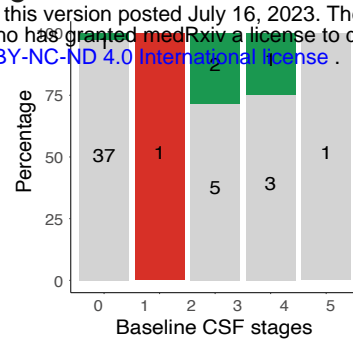

**Follow-up status:**

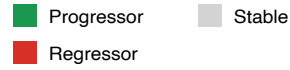

**D**

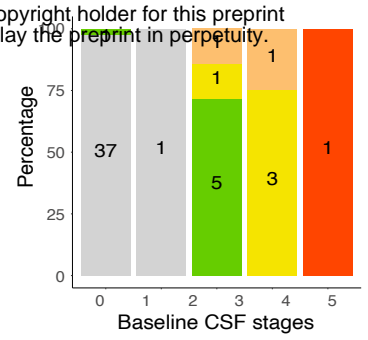

**Follow-up CSF stage:**

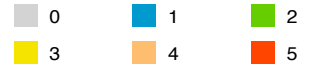

# BioFINDER-2

A

medRxiv preprint doi: <https://doi.org/10.1101/2023.07.14.23292650>; this version posted July 16, 2023. The copyright holder for this preprint (which was not certified by peer review) is the author/funder, who has granted medRxiv a license to display the preprint in perpetuity. It is made available under a [CC-BY-NC-ND 4.0 International license](https://creativecommons.org/licenses/by-nc-nd/4.0/).

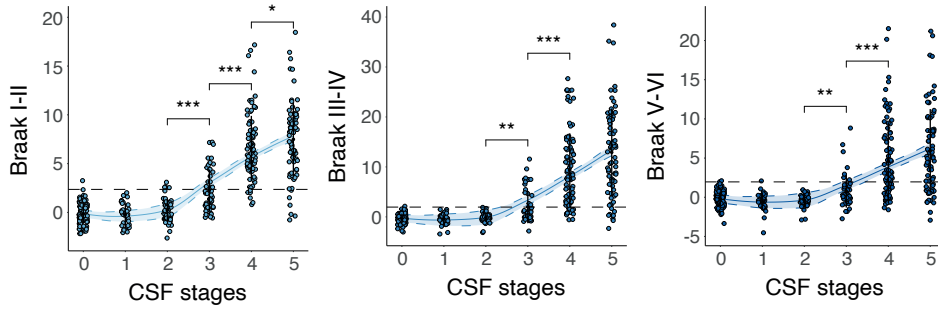

B

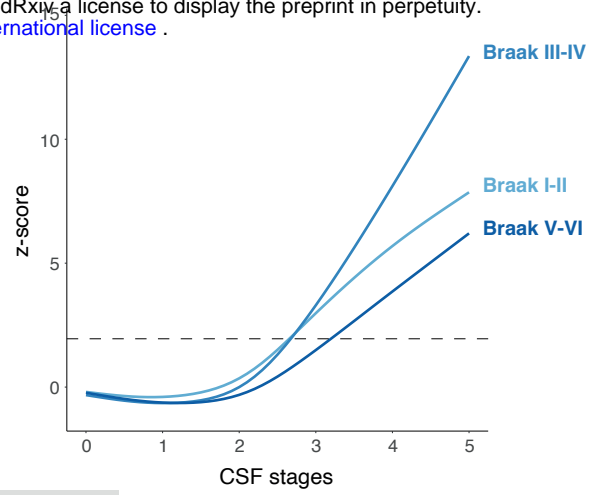

# Knight-ADRC

C

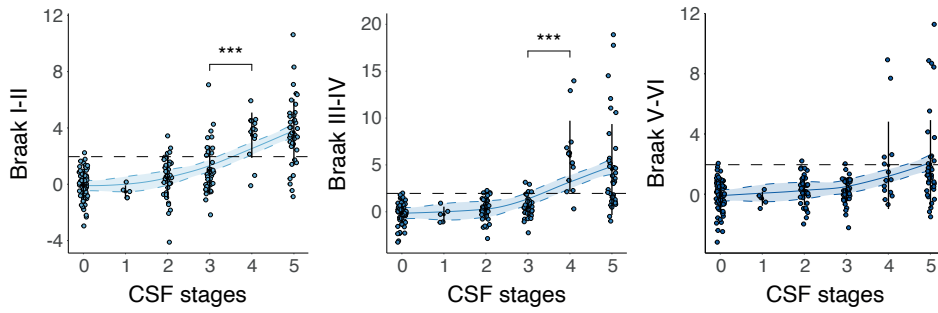

D

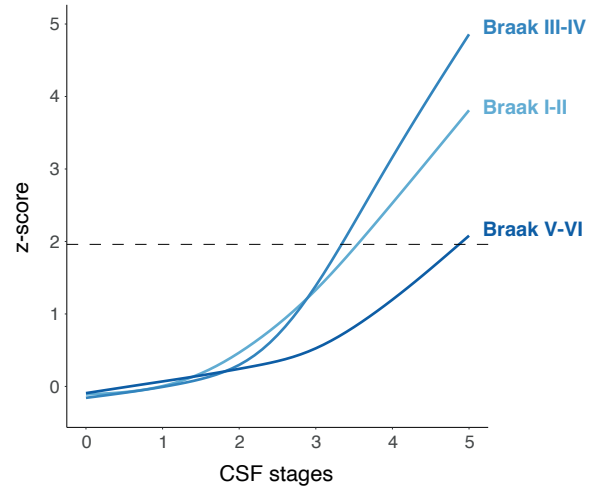

# BioFINDER-2

A

medRxiv preprint doi: <https://doi.org/10.1101/2023.07.14.23292650>; this version posted July 16, 2023. The copyright holder for this preprint (which was not certified by peer review) is the author/funder, who has granted medRxiv a license to display the preprint in perpetuity. It is made available under a [CC-BY-NC-ND 4.0 International license](https://creativecommons.org/licenses/by-nc-nd/4.0/).

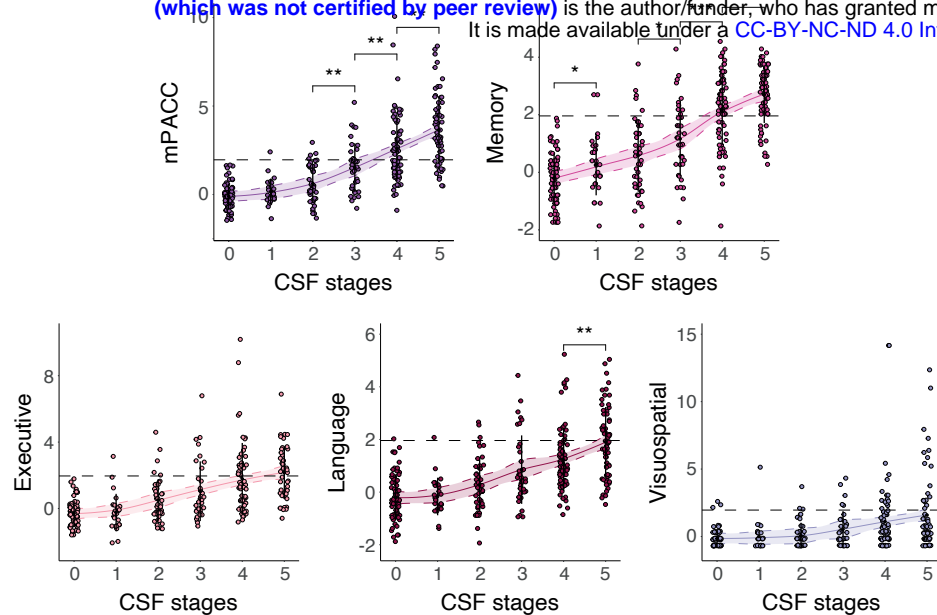

B

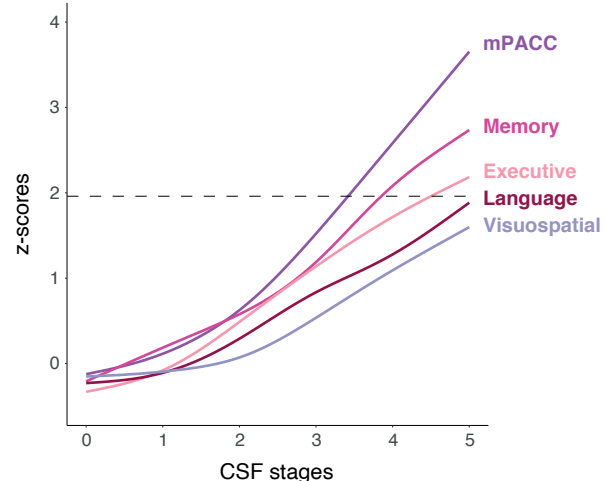

# Knight-ADRC

C

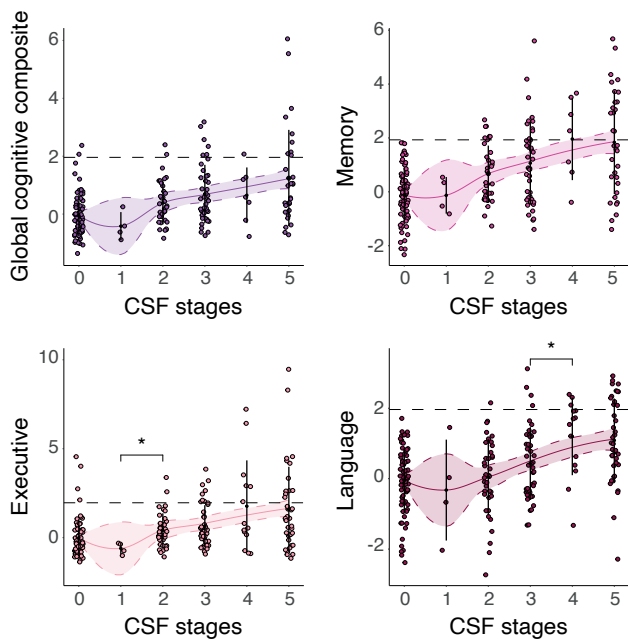

D

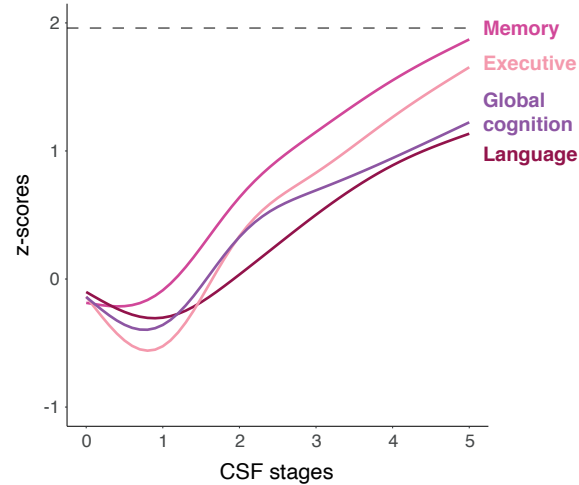



# BioFINDER-2

## A Progression from CU/MCI to AD dementia

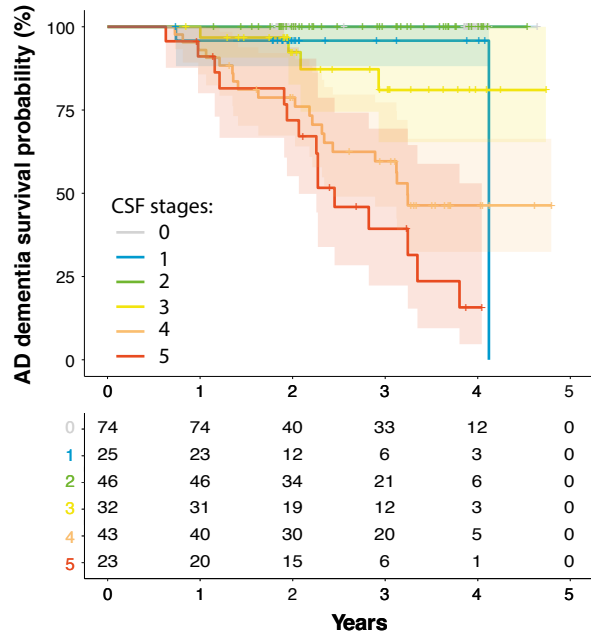

## B Progression from MCI to AD dementia

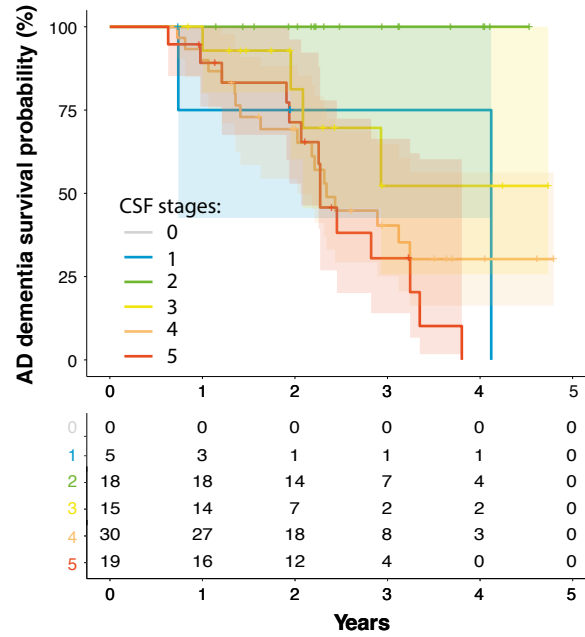

## C Progression from CU to MCI

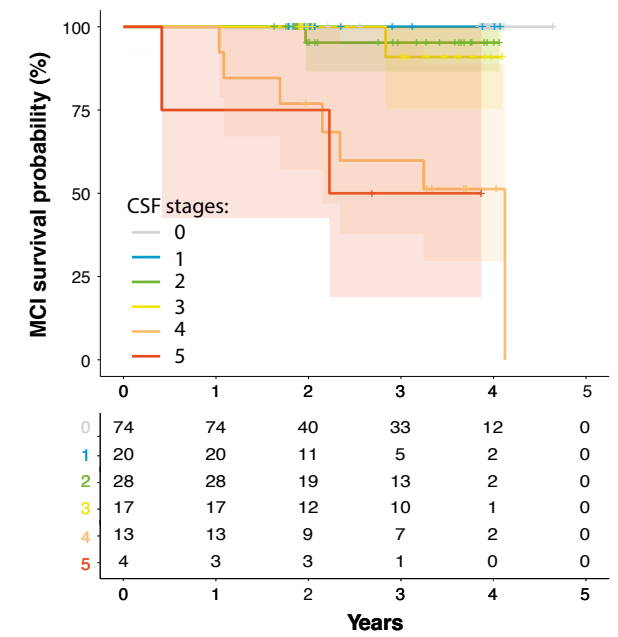

# Knight-ADRC

## D Progression from CDR $\leq 0.5$ to CDR $\geq 1$

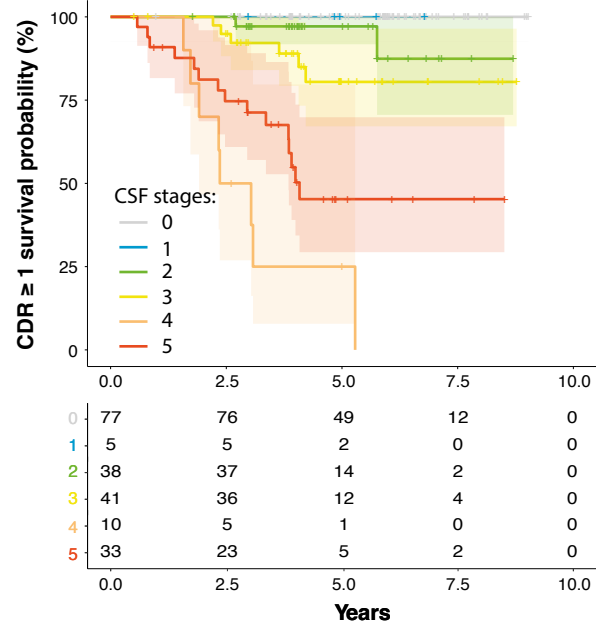

## E Progression from CDR = 0 to CDR $\geq 0.5$

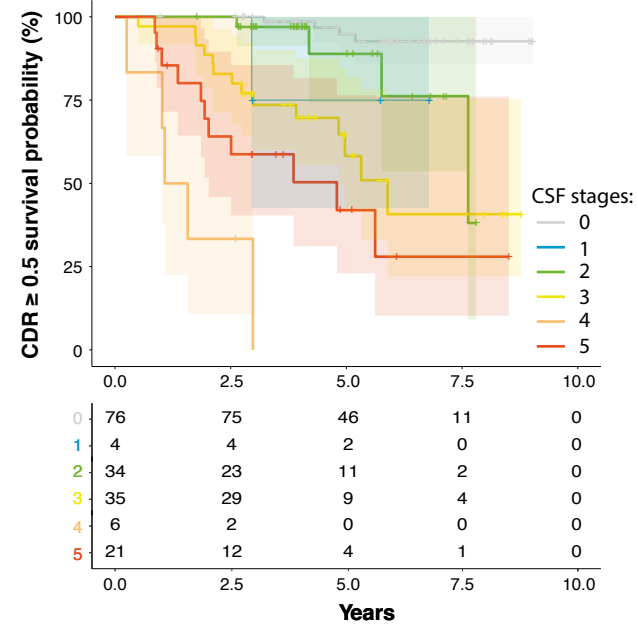

**A**

medRxiv preprint doi: <https://doi.org/10.1101/2023.07.14.23292650>; this version posted July 16, 2023. The copyright holder for this preprint (which was not certified by peer review) is the author/funder, who has granted medRxiv a license to display the preprint in perpetuity. It is made available under a [CC-BY-NC-ND 4.0 International license](https://creativecommons.org/licenses/by-nc-nd/4.0/).

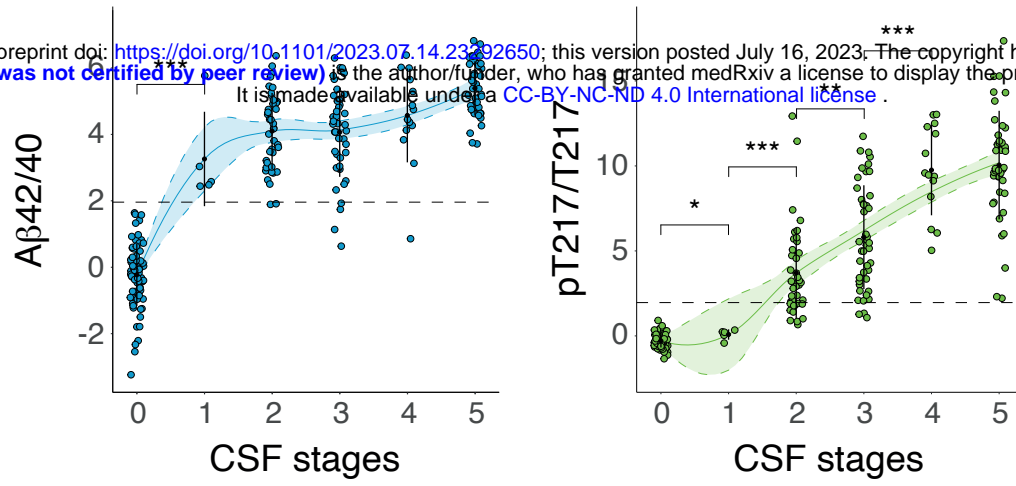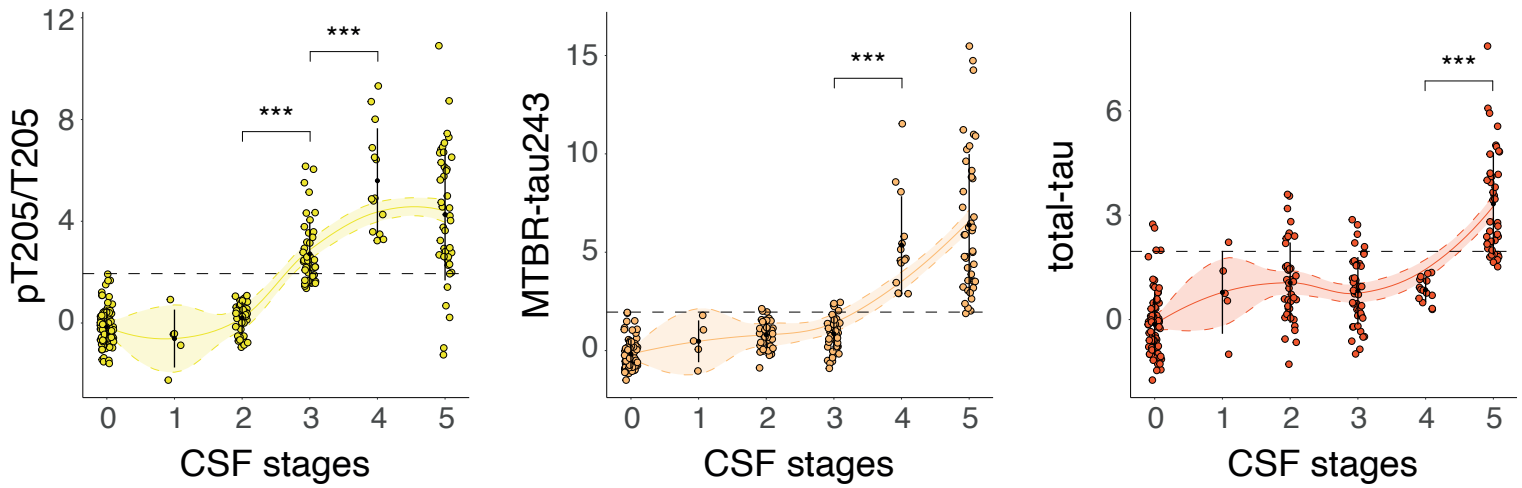**B**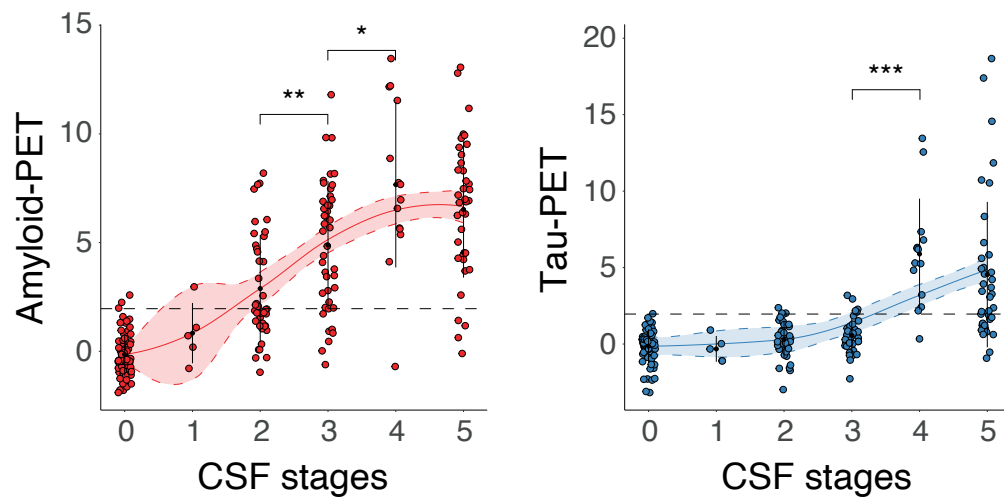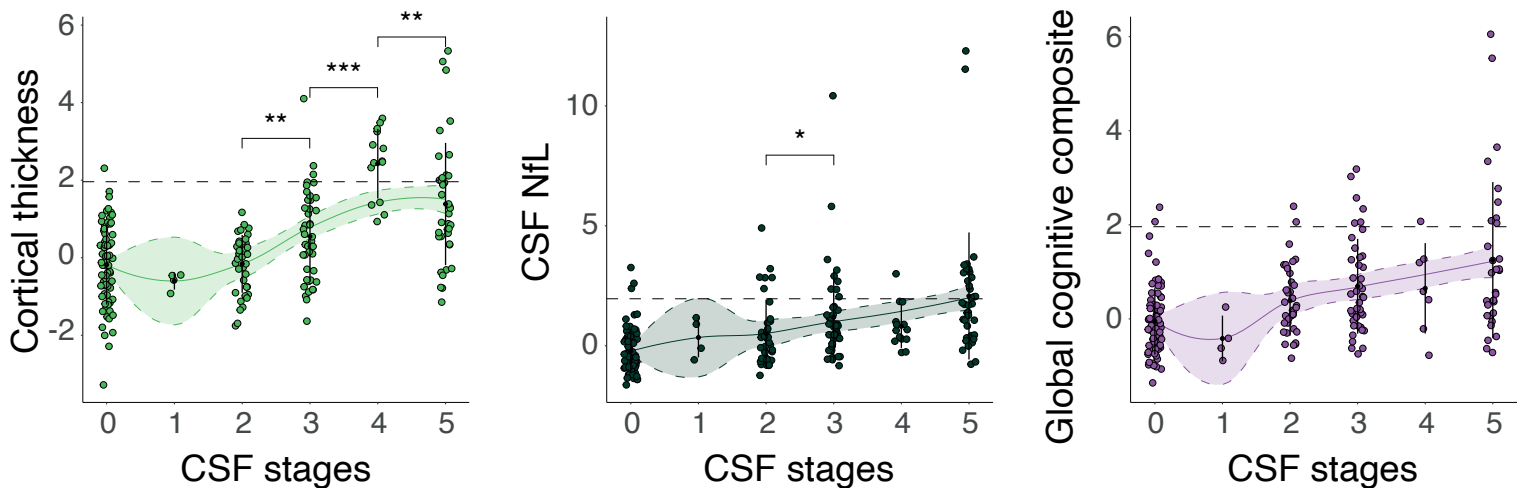

# BioFINDER-2

**A**

medRxiv preprint doi: <https://doi.org/10.1101/2023.07.14.23292650>; this version posted July 16, 2023. The copyright holder for this preprint (which was not certified by peer review) is the author/funder, who has granted medRxiv a license to display the preprint in perpetuity. It is made available under a [CC-BY-NC-ND 4.0 International license](https://creativecommons.org/licenses/by-nc-nd/4.0/).

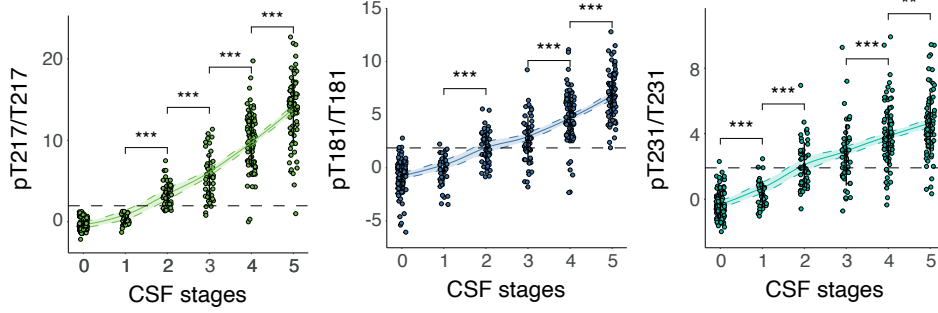**B**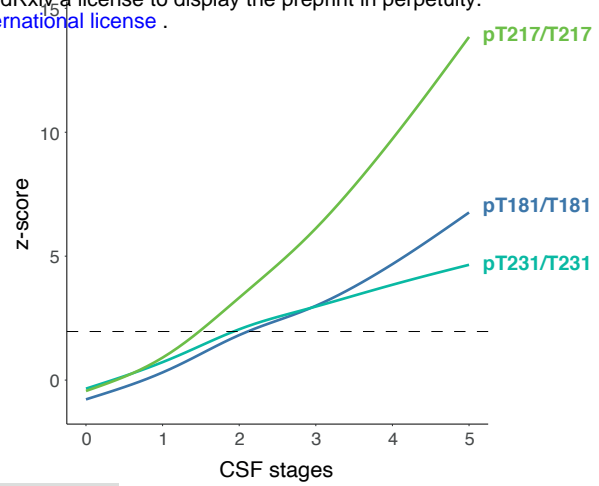

# Knight-ADRC

**C**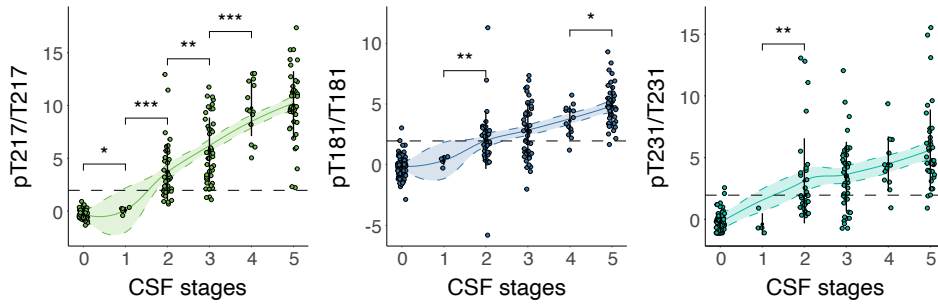**D**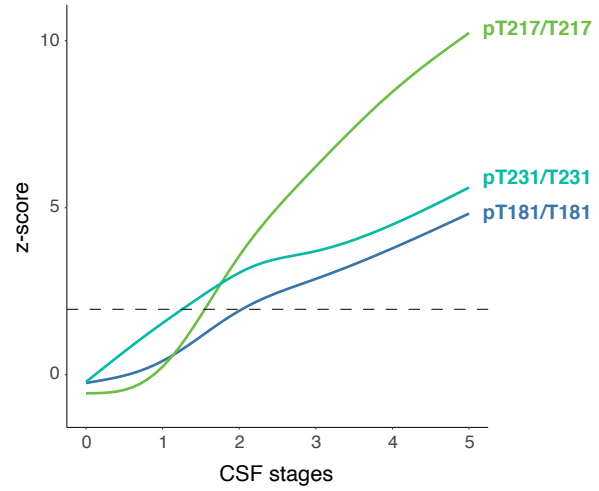

Source: https://medrxiv.org/content/10.1101/2023.07.14.23292650v1.full.pdf
